# Supplementary material
Source: PubMed Central journal article supplement (PMC3624390)
Supplement: JVI.03277-12_zjv999097509so1.pdf [file JVI.03277-12_zjv999097509so1.pdf]

**Table S1 – Characteristics of all sequenced dsNA bacteriophages endolysins identified.**

| Gram Positive Host | CODE                     | Phage name                                  | protein ID                    | Size (aa) | SAR            | N-terminal      | Prob    | E-Value | Middle           | Prob      | E-Value         | C-terminal   | Prob      | E-value                                           | Phage classification                                               |
|--------------------|--------------------------|---------------------------------------------|-------------------------------|-----------|----------------|-----------------|---------|---------|------------------|-----------|-----------------|--------------|-----------|---------------------------------------------------|--------------------------------------------------------------------|
| Actinomyces        | Ac1PpS5                  | Actinomyces phage Av-1                      | YP_001333671.1                | 272       |                | NLPC_P60        | 99.5    | 1.2E-14 |                  |           |                 | PG_binding_1 | 99.3      | 1.0E-12                                           | Podoviridae; picovirinae; unassigned picovirinae                   |
| Bacillus           | Ba1MpD913                | Bacillus phage 0305phi8-36                  | YP_001429728.1                | 368       |                | Glyco_hydro_25  | 100.0   | 2.0E-44 | SH3b.            | 97.3      | 9.2E-04         | SH3_3        | 98.3      | 8.3E-07                                           | Myoviridae                                                         |
|                    | Ba2OpJ92                 | Bacillus phage AP50                         | YP_002302543.1                | 252       |                | Amidase_3       | 100.0   | 1.8E-45 |                  |           |                 | SPOR         | 99.1      | 1.8E-10                                           | Tectiviridae; tectivirus; unclassified tectivirus                  |
|                    | Ba3PpA22                 | Bacillus phage B103                         | NP_690649.1                   | 263       |                | Phage_lysozyme  | 99.9    | 5.2E-27 |                  |           |                 | LysM         | 99.1/99.4 | 1.8E-11/6.1E-14                                   | Podoviridae; picovirinae; Phi29-like viruses                       |
|                    | Ba4OpD                   | Bacillus phage Bam35c                       | NP_943776.1                   | 265       |                | Glyco_hydro_25  | 100.0   | 1.1E-45 |                  |           |                 |              |           |                                                   | Tectiviridae; tectivirus                                           |
|                    | Ba5SpJ55                 | Bacillus phage BCJA1c                       | YP_164437.1                   | 355       |                | Amidase_3       | 100.0   | 1.9E-42 | PG_binding_1     | 99.6      | 7.3E-16         | PG_binding_1 | 98.3      | 2.2E-07                                           | Siphoviridae                                                       |
|                    | Ba6SpK1                  | Bacillus phage Cherry                       | YP_338149.1                   | 233       |                | Amidase_2       | 100.0   | 2.6E-29 |                  |           |                 | Amidase02_C  | 99.8      | 4.4E-19                                           | Siphoviridae                                                       |
|                    | Ba7SpK1                  | Bacillus phage Fah                          | YP_512326.1                   | 233       |                | Amidase_2       | 100.0   | 2.6E-29 |                  |           |                 | Amidase02_C  | 99.8      | 4.4E-19                                           | Siphoviridae                                                       |
|                    | Ba8PpJ2                  | Bacillus phage GA-1                         | NP_073698.1                   | 239       |                | Amidase_3       | 100.0   | 5.6E-47 |                  |           |                 | LysM         | 99.4      | 2.4E-14                                           | Podoviridae; picovirinae; Phi29-like viruses                       |
|                    | Ba9SpK1                  | Bacillus phage Gamma                        | YP_338200.1                   | 233       |                | Amidase_2       | 100.0   | 2.6E-29 |                  |           |                 | Amidase02_C  | 99.8      | 4.4E-19                                           | Siphoviridae                                                       |
|                    | Ba10OpJ92                | Bacillus phage GIL16c                       | YP_224129.1                   | 288       |                | Amidase_3       | 100.0   | 1.0E-43 |                  |           |                 | SPOR         | 99.3      | 7.2E-12                                           | Tectiviridae; Tectivirus; unclassified Tectivirus                  |
|                    | Ba11SpK1                 | Bacillus phage IEBH                         | YP_002154393.1                | 250       |                | Amidase_2       | 99.9    | 9.6E-29 |                  |           |                 | Amidase02_C  | 99.8      | 6.8E-21                                           | Siphoviridae                                                       |
|                    | Ba12XpK33                | Bacillus phage phBC6A51                     | NP_852545.1                   | 354       |                | Amidase_2       | 99.9    | 1.7E-27 |                  |           |                 | SH3_3        | 99.1/99.3 | 6E-11/3E-12                                       | Viruses; unclassified phages.                                      |
|                    | Ba13XpD1                 | Bacillus phage phBC6A52                     | NP_852605.1                   | 272       |                | Glyco_hydro_25  | 100.0   | 3.8E-47 |                  |           |                 | Amidase02_C  | 99.8      | 6.6E-21                                           | Viruses; unclassified phages                                       |
|                    | Ba14PpA22                | Bacillus phage phi29                        | YP_002004544.1                | 258       |                | Phage_lysozyme  | 100.0   | 2.5E-30 |                  |           |                 | LysM         | 99.0/99.3 | 1.1E-10/6.2E-13                                   | Podoviridae; picovirinae; Phi29-like viruses                       |
|                    | Ba15SpK33                | Bacillus phage Spbeta                       | NP_046578.1                   | 367       |                | Amidase_2       | 99.9    | 6.4E-27 |                  |           |                 | SH3_3        | 99.1/99.5 | 4.1E-11/1.7E-14                                   | Siphoviridae; SPbeta-like viruse                                   |
|                    | Ba16MpM55                | Bacillus phage SPO1                         | YP_002300379.1                | 343       |                | VanY            | 99.9    | 8.0E-23 |                  |           |                 | PG_binding_1 | 99.5/99.4 | 3.1E-14/1.2E-13                                   | Myoviridae;SPO1-like viruses                                       |
|                    | Ba17SpJ2                 | Bacillus phage SPP1                         | NP_690702.1                   | 271       |                | Amidase_3       | 100.0   | 4.9E-47 | LysM             | 96.9      | 4.5E-04         |              |           |                                                   | Siphoviridae;Lambda-like viruses; unclassified Lambda-like viruses |
|                    | Ba18SpK4                 | Bacillus phage TP21-L                       | YP_002333580.1                | 269       |                | Amidase_2       | 99.9    | 5.7E-28 |                  |           |                 | SH3_5        | 99.8      | 2.9E-19                                           | Siphoviridae                                                       |
|                    | Ba19SpK1                 | Bacillus phage WBeta                        | YP_459981.1                   | 233       |                | Amidase_2       | 100.0   | 2.6E-29 |                  |           |                 | Amidase02_C  | 99.8      | 4.4E-19                                           | Siphoviridae                                                       |
|                    | Ba20PpA22                | Bacillus amyloliquefaciens phage Morita2001 | AAK40280.1                    | 258       |                | Phage_lysozyme  | 100.0   | 8.7E-31 | LysM             | 99.0      | 9.6E-11         | LysM         | 99.3      | 3.5E-13                                           | Podoviridae                                                        |
| Ba21PpA22          | Bacillus phage Nf        | ACH57083.1                                  | 262                           |           | Phage_lysozyme | 99.9            | 5.8E-26 | LysM    | 99.1             | 4.3E-11   | LysM            | 99.4         | 5.6E-14   | Podoviridae; Picovirinae; Phi29-like viruses.     |                                                                    |
| Ba22MpK4           | Bacillus phage W.Ph.     | YP_004957016.1                              | 276                           |           | Amidase_2      | 99.9            | 8.6E-28 |         |                  |           | SH3_5           | 99.8         | 2.5E-19   | Myoviridae                                        |                                                                    |
| Ba23MpM5           | Bacillus phage SP10      | BAK52943.1                                  | 236                           |           | VanY           | 99.8            | 1.1E-20 |         |                  |           | PG_binding_1    | 99.6         | 4.9E-15   | Myoviridae                                        |                                                                    |
| Ba24PpA22          | Bacillus phage PZA       | P07540.1                                    | 258                           |           | Phage_lysozyme | 100.0           | 3.8E-31 | LysM    | 99.0             | 8.6E-11   | LysM            | 99.4         | 2.3E-13   | Podoviridae; Picovirinae; Phi29-like viruses      |                                                                    |
| Ba25SpJ4           | Bacillus phage BCP78     | AEW47021.1                                  | 272                           |           | Amidase_3      | 100.0           | 1.5E-44 |         |                  |           | SH3_5           | 99.6         | 1.5E-15   | Siphoviridae.                                     |                                                                    |
| Brochothrix        | Br1MpK4                  | Brochothrix phage A9                        | YP_004301385.1                | 280       |                | Amidase_2       | 99.9    | 4.2E-27 |                  |           |                 | SH3_5        | 99.9      | 6.5E-23                                           | Myoviridae;Spounavirinae; unclassified Spounavirinae               |
|                    | Br2SpK4                  | Brochothrix phage BL3                       | YP_004301557.1                | 273       |                | Amidase_2       | 99.9    | 5.7E-28 |                  |           |                 | SH3_5        | 99.9      | 2.3E-22                                           | Siphoviridae                                                       |
|                    | Br3SpK5                  | Brochothrix phage NF5                       | YP_004301299.1                | 251       |                | Amidase_2       | 100.0   | 6.3E-29 |                  |           |                 | PG_binding_1 | 98.3      | 1.5E-07                                           | Siphoviridae                                                       |
| Clostridium        | Cl1XpJ                   | Clostridium phage phiCP39-O                 | P_002265435.1                 | 213       |                | Amidase_3       | 100.0   | 2.9E-45 |                  |           |                 |              |           |                                                   | Viruses; unclassified phages                                       |
|                    | Cl2MpK5                  | Clostridium phage c-st                      | YP_398585.1                   | 309       |                | Amidase_2       | 99.9    | 1.5E-25 | PG_binding_1     | 99.6      | 7.8E-16         |              |           |                                                   | Myoviridae                                                         |
|                    | Cl3MpJ                   | Clostridium phage phi CD119                 | YP_529586.1                   | 271       |                | Amidase_3       | 100.0   | 1.6E-42 |                  |           |                 |              |           |                                                   | Myoviridae                                                         |
|                    | Cl4SpJ33                 | Clostridium phage phi3626                   | NP_612849.1                   | 347       |                | Amidase_3       | 100.0   | 2.2E-44 | SH3_3            | 98.2      | 7.9E-07         | SH3_3        | 99.0      | 3.7E-10                                           | Siphoviridae                                                       |
|                    | Cl5MpJ                   | Clostridium phage phiC2                     | YP_001110754.1                | 270       |                | Amidase_3       | 100.0   | 1.5E-43 |                  |           |                 |              |           |                                                   | Myoviridae                                                         |
|                    | Cl6MpJ                   | Clostridium phage phiCD27                   | YP_002290910.1                | 270       |                | Amidase_3       | 100.0   | 5.9E-43 |                  |           |                 |              |           |                                                   | Myoviridae                                                         |
|                    | Cl7SpJ1                  | Clostridium phage phiCD38-2                 | YP_004508401.1                | 268       |                | Amidase_3       | 100.0   | 3.7E-44 |                  |           |                 | Amidase02_C  | 98.2      | 1.2E-06                                           | Siphoviridae                                                       |
|                    | Cl8SpJ1                  | Clostridium phage phiCD6356                 | YP_004306129.1                | 268       |                | Amidase_3       | 100.0   | 2.7E-44 |                  |           |                 | Amidase02_C  | 98.3      | 9.3E-07                                           | Siphoviridae                                                       |
|                    | Cl9SpD7                  | Clostridium phage phiCTP1                   | YP_003856822.1                | 274       |                | Glyco_hydro_25  | 100.0   | 4.9E-48 | Cpl-7            | 97.8      | 4.2E-06         |              |           |                                                   | Siphoviridae                                                       |
|                    | Cl10XpJ3                 | Clostridium phage D-1873                    | ZP_04863759.1                 | 249       |                | Amidase_3       | 100.0   | 1.9E-44 |                  |           |                 | SH3_3        | 96.1      | 7.6E-04                                           | Viruses; unclassified phages                                       |
|                    | Cl11XpD33                | Clostridium phage phiSM101                  | YP_699978.1                   | 342       |                | Glyco_hydro_25  | 100.0   | 2.0E-47 | SH3_3            | 99.3      | 5.0E-12         | SH3_3        | 99.2      | 5.4E-12                                           | unclassified dsDNA phages                                          |
|                    | Cl12SpJ                  | Clostridium phage phiCP26F                  | AEA86246.1                    | 212       |                | Amidase_3       | 100.0   | 5.5E-45 |                  |           |                 |              |           |                                                   | Siphoviridae.                                                      |
|                    | Cl13SpJ                  | Clostridium phage phiCP130                  | AEI74454.1                    | 212       |                | Amidase_3       | 100.0   | 1.5E-45 |                  |           |                 |              |           |                                                   | Siphoviridae.                                                      |
|                    | Cl14SpJ                  | Clostridium phage phiCP34O                  | AEI74506.1                    | 213       |                | Amidase_3       | 100.0   | 1.0E-45 |                  |           |                 |              |           |                                                   | Siphoviridae.                                                      |
| Cl15PpJ            | Clostridium phage phi24R | AEW47846.1                                  | 212                           |           | Amidase_3      | 100.0           | 1.8E-47 |         |                  |           |                 |              |           | Podoviridae; Picovirinae; unassigned Picovirinae. |                                                                    |
| Corynebacterium    | Co1SpK                   | Corynebacterium phage BFK20                 | YP_001456754.2                | 270       |                | Amidase_2       | 99.9    | 2.6E-26 |                  |           |                 |              |           |                                                   | Siphoviridae                                                       |
|                    | Co2SpCT                  | Corynebacterium phage P1201                 | YP_001468954.1                | 502       |                | Glyco_hydro_19  | 100.0   | 1.4E-35 | Peptidase_C39_2  | 99.7      | 5.0E-16         |              |           |                                                   | Siphoviridae                                                       |
| Enterococcus       | En1SpK                   | Enterococcus phage EFAP-1                   | YP_002727874.1                | 328       |                | Amidase_2       | 99.9    | 1.5E-25 |                  |           |                 |              |           |                                                   | Siphoviridae.                                                      |
|                    | En2SpD22                 | Enterococcus phage phiEF11                  | YP_003358816.1                | 419       |                | Glyco_hydro_25  | 100.0   | 6.1E-39 |                  |           |                 | LysM         | 99.0/99.1 | 1.4E-10/8E-12                                     | Siphoviridae.                                                      |
|                    | En3SpQH                  | Enterococcus phage phiEF11 (another)        | YP_003358818.1                | 421       |                | Peptidase_M23   | 99.9    | 5.5E-25 | Glucosaminidase  | 99.9      | 1.2E-27         |              |           |                                                   | Siphoviridae.                                                      |
|                    | En4MpK                   | Enterococcus phage phiEF24C                 | YP_001504118.1                | 289       |                | Amidase_2       | 99.9    | 2.6E-28 |                  |           |                 |              |           |                                                   | Myoviridae; SPO1-like viruses; unclassified SPO1-like viruses.     |
|                    | En5SpD22                 | Enterococcus phage phiFL1A                  | YP_003347517.1                | 433       |                | Glyco_hydro_25  | 100.0   | 5.3E-38 |                  |           |                 | LysM         | 98.9/99.1 | 2.6E-10/3.1E-11                                   | Siphoviridae.                                                      |
|                    | En6SpD22                 | Enterococcus phage phiFL2A                  | YP_003347352.1                | 433       |                | Glyco_hydro_25  | 100.0   | 5.3E-38 |                  |           |                 | LysM         | 98.9/99.1 | 2.6E-10/3.1E-11                                   | Siphoviridae.                                                      |
|                    | En7SpD22                 | Enterococcus phage phiFL3A                  | YP_003347625.1                | 419       |                | Glyco_hydro_25  | 100.0   | 4.2E-37 |                  |           |                 | LysM         | 98.9/99.1 | 2.7E-10/1.4E-11                                   | Siphoviridae.                                                      |
|                    | En8SpD22                 | Enterococcus phage phiFL4A                  | YP_003347409.1                | 433       |                | Glyco_hydro_25  | 100.0   | 1.1E-38 |                  |           |                 | LysM         | 98.9/99.1 | 6E-10/1E-11                                       | Siphoviridae.                                                      |
|                    | En9SpY                   | Enterococcus phage SAP6                     | AEM24735.1                    | 237       |                | CHAP            | 99.9    | 8.6E-23 |                  |           |                 |              |           |                                                   | Siphoviridae.                                                      |
| Geobacillus        | Ge1XpJ                   | Geobacillus phage GBSV1                     | YP_764491.1                   | 226       |                | Amidase_3       | 100.0   | 2.3E-48 |                  |           |                 |              |           |                                                   | Caudovirales.                                                      |
|                    | Ge2XpJ                   | Geobacillus virus E2                        | YP_001285830.1                | 233       |                | Amidase_3       | 100.0   | 1.4E-47 |                  |           |                 |              |           |                                                   | Viruses; unclassified phages                                       |
|                    | Ge3XpJ                   | Deep-sea thermophilic phage D6E             | ADE87506.1                    | 227       |                | Amidase_3       | 100.0   | 4.4E-48 |                  |           |                 |              |           |                                                   | unclassified dsDNA phages.                                         |
| Gordonia           | Go1SpT                   | Gordonia phage GRU1                         | YP_004935859.1/YP_004935860.1 | 552       |                | Peptidase_C39_2 | 99.8    | 2.4E-18 | Glyco_hydro_19   | 100.0     | 2.5E-39         |              |           |                                                   | Siphoviridae.                                                      |
|                    | Go2SpP                   | Gordonia phage GTE2                         | YP_004678788.1                | 181       |                |                 |         |         | Peptidase_M15_4  | 99.8      | 3.0E-19         |              |           |                                                   | Siphoviridae.                                                      |
|                    | Go3SpT                   | Gordonia phage GTE5                         | YP_004935769.1/YP_004935770.1 | 552       |                | Peptidase_C39_2 | 99.7    | 8.1E-16 | Glyco_hydro_19   | 100.0     | 1.2E-41         |              |           |                                                   | Siphoviridae.                                                      |
|                    | Go4SpK                   | Gordonia phage GTE7                         | YP_004934729.1                | 211       |                | Amidase_2       | 100.0   | 2.4E-29 |                  |           |                 |              |           |                                                   | Siphoviridae.                                                      |
| Lactobacillus      | La1SpK666                | Lactobacillus phage A2                      | NP_680500.1                   | 350       |                | Amidase_2       | 99.9    | 2.4E-25 | ChW (smart/pfam) | 99.3/99.5 | 2.3E-12/6.3E-15 | ChW (pfam)   | 98.9      | 1.0E-09                                           | Siphoviridae.                                                      |
|                    | La2SpD                   | Lactobacillus phage KC5a                    | YP_529896.1                   | 246       |                | Glyco_hydro_25  | 100.0   | 3.1E-45 |                  |           |                 |              |           |                                                   | Siphoviridae.                                                      |
|                    | La3MpD222                | Lactobacillus phage Lb338-1                 | YP_002790806.1                | 491       |                | Glyco_hydro_25  | 100.0   | 7.3E-41 | LysM             | 99.0      | 2.2E-10         | LysM(smart)  | 99.2/99.5 | 1.4E-11/5E-14                                     | Myoviridae.                                                        |
|                    | La4SpD22                 | Lactobacillus phage Lc-Nu                   | YP_358779.1                   | 432       |                | Glyco_hydro_25  | 100.0   | 7.9E-41 |                  |           |                 | LysM         | 98.9/99.2 | 7.1E-10/2E-12                                     | Siphoviridae.                                                      |
|                    | La5SpD42                 | Lactobacillus phage phiAT3                  | YP_025045.1                   | 393       |                | Glyco_hydro_25  | 100.0   | 1.8E-43 | SH3_5            | 98.4      | 1.3E-07         | LysM         | 99.4      | 1.3E-13                                           | Siphoviridae.                                                      |
|                    | La6SpD93                 | Lactobacillus phage LL-H                    | YP_001285906.1                | 298       |                | Glyco_hydro_25  | 100.0   | 4.9E-47 |                  |           |                 | SLAP         | 99.8      | 1.2E-08                                           | Siphoviridae.                                                      |
|                    | La7MpD42                 | Lactobacillus phage LP65                    | YP_164723.1                   | 464       |                | Glyco_hydro_25  | 100.0   | 2.6E-41 | SH3_5            | 98.1      | 2.3E-07         | LysM         | 99.3      | 1.7E-12                                           | Myoviridae; SPO1-like viruses; unclassified SPO1-like viruses.     |

|               |                          |                                        |                |                    |                    |         |         |                 |           |                    |                 |                               |                                                                |                                                              |
|---------------|--------------------------|----------------------------------------|----------------|--------------------|--------------------|---------|---------|-----------------|-----------|--------------------|-----------------|-------------------------------|----------------------------------------------------------------|--------------------------------------------------------------|
| Lactobacillus | La8SpD22                 | Lactobacillus phage Lrm1               | YP_002117687.1 | 432                | Glyco_hydro_25     | 100.0   | 1.1E-40 |                 |           | LysM               | 98.9/99.3       | 3.6E-10/1.2E-12               | Siphoviridae.                                                  |                                                              |
|               | La9SpD33                 | Lactobacillus phage Lv-1               | YP_002455807.1 | 373                | Glyco_hydro_25     | 100.0   | 1.2E-44 |                 |           | SH3_3              | 97.6/98.1       | 5.3E-05/2.1E-06               | Siphoviridae.                                                  |                                                              |
|               | La10SpD4                 | Lactobacillus phage phiadh             | NP_050170.1    | 317                | Glyco_hydro_25     | 100.0   | 6.1E-46 |                 |           | SH3_5              | 99.7            | 1.9E-18                       | Siphoviridae.                                                  |                                                              |
|               | La11SpD42                | Lactobacillus phage phig1e             | YP_003084340.1 | 442                | Glyco_hydro_25     | 100.0   | 1.1E-42 | SH3_5           | 98.1      | 1.4E-07            | LysM            | 99.3                          | 2.7E-13                                                        | Siphoviridae.                                                |
|               | La12SpD4                 | Lactobacillus phage phiJL-1            | YP_223905.1    | 398                | Glyco_hydro_25     | 100.0   | 3.8E-43 |                 |           | SH3_5              | 99.7            | 6.2E-18                       | Siphoviridae.                                                  |                                                              |
|               | La13SpD4                 | Lactobacillus prophage Lj928           | NP_958555.1    | 315                | Glyco_hydro_25     | 100.0   | 4.9E-47 |                 |           | SH3_5              | 99.8            | 8.5E-19                       | Siphoviridae.                                                  |                                                              |
|               | La14SpD4                 | Lactobacillus prophage Lj965           | NP_958600.1    | 310                | Glyco_hydro_25     | 100.0   | 8.3E-47 |                 |           | SH3_5              | 99.8            | 1.1E-18                       | Siphoviridae.                                                  |                                                              |
|               | La15XpD4                 | Lactobacillus johnsonii prophage Lj771 | YP_001642397.1 | 300                | Glyco_hydro_25     | 100.0   | 2.4E-43 |                 |           | SH3_5              | 99.9            | 3.3E-22                       | Viruses; unclassified phages                                   |                                                              |
|               | La16XpD                  | Lactobacillus helveticus phage f-0303  | AAQ06663.1     | 373                | Glyco_hydro_25     | 100.0   | 3.5E-43 |                 |           |                    |                 |                               | Viruses; unclassified phages.                                  |                                                              |
|               | La17SpD4                 | Lactobacillus phage c5                 | ACA63343.1     | 301                | Glyco_hydro_25     | 100.0   | 1.3E-45 |                 |           | SH3_5              | 99.8            | 4.5E-20                       | Siphoviridae.                                                  |                                                              |
| La18SpD42     | Lactobacillus phage Sha1 | ADW01314.1                             | 390            | Glyco_hydro_25     | 100.0              | 7.0E-43 | SH3_5   | 97.5            | 2.5E-05   | LysM               | 99.3            | 1.3E-12                       | Siphoviridae.                                                  |                                                              |
| Leuconostoc   | Le1SpK                   | Leuconostoc phage 1-A4                 | ADD71758.1     | 293                | Amidase_2          | 99.9    | 3.3E-28 |                 |           |                    |                 |                               | Siphoviridae.                                                  |                                                              |
| Lactococcus   | Lc1SpK91                 | Lactococcus phage SL4                  | ACU46783.1     | 174                | Amidase_2          | 99.7    | 6.2E-17 |                 |           | SH3b               | 97.7            | 7.4E-06                       | Siphoviridae.                                                  |                                                              |
|               | Lc2SpK                   | Lactococcus phage CB13                 | ACU46835.1     | 234                | Amidase_2          | 99.9    | 1.1E-27 |                 |           |                    |                 |                               | Siphoviridae.                                                  |                                                              |
|               | Lc3SpK                   | Lactococcus phage 712                  | YP_764281.1    | 258                | Amidase_2          | 99.9    | 7.5E-28 |                 |           |                    |                 |                               | Siphoviridae.                                                  |                                                              |
|               | Lc4SpK                   | Lactococcus phage P008                 | YP_762533.1    | 233                | Amidase_2          | 99.9    | 2.5E-27 |                 |           |                    |                 |                               | Siphoviridae.                                                  |                                                              |
|               | Lc5SpK                   | Lactococcus phage Q54                  | YP_762603.1    | 256                | Amidase_2          | 99.9    | 2.6E-27 |                 |           |                    |                 |                               | Siphoviridae.                                                  |                                                              |
|               | Lc6SpK                   | Lactococcus phage bIBB29               | YP_002004009.1 | 233                | Amidase_2          | 99.9    | 1.4E-27 |                 |           |                    |                 |                               | Siphoviridae.                                                  |                                                              |
|               | Lc7SpK                   | Lactococcus phage bIL170               | NP_047135.1    | 233                | Amidase_2          | 99.9    | 6.3E-28 |                 |           |                    |                 |                               | Siphoviridae.                                                  |                                                              |
|               | Lc8SpK                   | Lactococcus phage jj50                 | YP_764334.1    | 253                | Amidase_2          | 99.9    | 1.1E-27 |                 |           |                    |                 |                               | Siphoviridae.                                                  |                                                              |
|               | Lc9SpK                   | Lactococcus phage sk1                  | NP_044966.1    | 246                | Amidase_2          | 99.9    | 1.8E-27 |                 |           |                    |                 |                               | Siphoviridae.                                                  |                                                              |
|               | Lc10SpK66                | Lactococcus phage 949                  | YP_004306215.1 | 343                | Amidase_2          | 99.9    | 7.9E-26 |                 |           | ChW (pfam)         | 99.2/99.0       | 7.1E-12/1.2E-10               | Siphoviridae.                                                  |                                                              |
|               | Lc11PpY                  | Lactococcus phage ascphi28             | YP_001687525.1 | 375                | CHAP               | 99.6    | 1.3E-15 |                 |           |                    |                 |                               | Podoviridae.                                                   |                                                              |
|               | Lc12SpS55                | Lactococcus phage bIL285               | NP_076634.1    | 259                | NLPC_P60           | 99.9    | 5.5E-25 | PG_binding_1    | 97.7      | 2.0E-05            | PG_binding_1    | 99.1                          | 3.0E-11                                                        | Siphoviridae.                                                |
|               | Lc13SpS55                | Lactococcus phage bIL286               | NP_076695.1    | 259                | NLPC_P60           | 99.9    | 2.1E-25 | PG_binding_1    | 97.0      | 2.3E-04            | PG_binding_1    | 99.2                          | 1.3E-11                                                        | Siphoviridae.                                                |
|               | Lc14SpS55                | Lactococcus phage bIL309               | NP_076751.1    | 259                | NLPC_P60           | 99.9    | 7.9E-25 | PG_binding_1    | 97.5      | 6.2E-05            | PG_binding_1    | 99.2                          | 1.2E-11                                                        | Siphoviridae.                                                |
|               | Lc15SpA                  | Lactococcus phage bIL67                | NP_042321.2    | 226                | Phage_lysozyme     | 100.0   | 5.6E-30 |                 |           |                    |                 |                               | Siphoviridae; c2-like viruses.                                 |                                                              |
|               | Lc16SpS55                | Lactococcus phage BK5-T                | NP_116519.1    | 259                | NLPC_P60           | 99.9    | 4.3E-25 | PG_binding_1    | 97.6      | 2.5E-05            | PG_binding_1    | 99.1                          | 4.4E-11                                                        | Siphoviridae.                                                |
|               | Lc17SpA                  | Lactococcus phage c2                   | NP_043551.1    | 226                | Phage_lysozyme     | 99.9    | 3.3E-28 |                 |           |                    |                 |                               | Siphoviridae; c2-like viruses.                                 |                                                              |
|               | Lc18PpY                  | Lactococcus phage KSY1                 | YP_001469051.1 | 199                | CHAP               | 99.9    | 1.7E-22 |                 |           |                    |                 |                               | Podoviridae.                                                   |                                                              |
|               | Lc19PpK66                | Lactococcus phage KSY1 (another)       | YP_001469072.1 | 347                | Amidase_2          | 99.9    | 9.9E-25 |                 |           | ChW (pfam)         | 99.2/99.1       | 7.6E-12/2.7E-11               | Podoviridae.                                                   |                                                              |
|               | Lc20SpK91                | Lactococcus phage P087                 | YP_002875753.1 | 237                | Amidase_2          | 99.9    | 8.3E-29 |                 |           | SH3b               | 97.5            | 4.4E-05                       | Siphoviridae.                                                  |                                                              |
|               | Lc21SpD                  | Lactococcus phage 4268                 | NP_839940.1    | 305                | Glyco_hydro_25     | 100.0   | 2.1E-44 |                 |           |                    |                 |                               | Siphoviridae.                                                  |                                                              |
|               | Lc22SpD22                | Lactococcus phage phiLC3               | NP_996722.1    | 429                | SAR Glyco_hydro_25 | 100.0   | 1.9E-36 |                 |           | LysM               | 98.9/99.0       | 3.7E-10/5.7E-11               | Siphoviridae.                                                  |                                                              |
|               | Lc23SpK                  | Lactococcus phage r1t                  | NP_695077.1    | 270                | Amidase_2          | 99.9    | 1.5E-25 |                 |           |                    |                 |                               | Siphoviridae.                                                  |                                                              |
|               | Lc24SpD22                | Lactococcus phage TP901-1              | NP_112716.1    | 429                | SAR Glyco_hydro_25 | 100.0   | 1.7E-36 |                 |           | LysM               | 98.9/99.1       | 4.5E-10/1.6E-11               | Siphoviridae.                                                  |                                                              |
|               | Lc25SpD22                | Lactococcus phage Tuc2009              | NP_108734.1    | 428                | Glyco_hydro_25     | 100.0   | 2.1E-38 |                 |           | LysM               | 98.9/99.1       | 6.8E-10/1.5E-11               | Siphoviridae.                                                  |                                                              |
| Lc26SpD22     | Lactococcus phage ul36   | NP_663692.1                            | 429            | SAR Glyco_hydro_25 | 100.0              | 1.7E-36 |         |                 | LysM      | 98.9/99.1          | 7.4E-10/1.8E-11 | Siphoviridae.                 |                                                                |                                                              |
| Lc27SpD22     | Lactococcus phage P335   | ABI54253.1                             | 432            | SAR Glyco_hydro_25 | 100.0              | 5.2E-43 |         |                 | LysM      | 98.9/99.0          | 5.3E-10/4.9E-11 | Siphoviridae.                 |                                                                |                                                              |
| Lc28XpY4      | Lactococcus phage 1358   | ADD25719.1                             | 233            | CHAP               | 99.8               | 1.4E-19 |         |                 | SH3_5     | 99.9               | 8.7E-26         | Viruses; unclassified phages. |                                                                |                                                              |
| Listeria      | Li1SpJ3                  | Listeria phage 2389                    | NP_511002.1    | 314                | Amidase_3          | 100.0   | 6.4E-44 | SH3_3           | 97.5      | 8.2E-05            |                 |                               | Siphoviridae.                                                  |                                                              |
|               | Li2SpM                   | Listeria phage A006                    | YP_001468860.1 | 235                | VanY               | 99.9    | 1.2E-25 |                 |           |                    |                 |                               | Siphoviridae.                                                  |                                                              |
|               | Li3SpMX                  | Listeria phage A118                    | NP_463486.1    | 281                | VanY               | 99.9    | 2.6E-24 | DUF3597         | 99.5      | 7.6E-15            |                 |                               | Siphoviridae.                                                  |                                                              |
|               | Li4SpM9                  | Listeria phage A500                    | YP_001468411.1 | 289                | VanY               | 99.8    | 5.5E-22 |                 |           | SH3-related domain | 100.0           | 4.4E-54                       | Siphoviridae.                                                  |                                                              |
|               | Li5MpK                   | Listeria phage A511                    | YP_001468459.1 | 341                | Amidase_2          | 99.9    | 9.9E-26 |                 |           |                    |                 |                               | Myoviridae; SPO1-like viruses; unclassified SPO1-like viruses. |                                                              |
|               | Li6SpM33                 | Listeria phage B025                    | YP_001468664.1 | 276                | VanY               | 99.9    | 2.9E-26 | SH3_3           | 99.4      | 3.6E-13            | SH3_3           | 99.4                          | 8.4E-14                                                        | Siphoviridae.                                                |
|               | Li7SpJ90                 | Listeria phage B054                    | YP_001468737.1 | 321                | Amidase_3          | 100.0   | 3.6E-45 |                 |           | FOG                | 99.8            | 4.0E-19                       | Siphoviridae.                                                  |                                                              |
|               | Li8SpM33                 | Listeria phage P35                     | YP_001468812.1 | 291                | VanY               | 99.9    | 1.1E-24 |                 |           | SH3_3              | 96.9/97.9       | 0.0013/1.1E-05                | Siphoviridae.                                                  |                                                              |
| Li9SpD22      | Listeria phage P40       | YP_002261442.1                         | 344            | Glyco_hydro_25     | 100.0              | 1.1E-46 |         |                 | LysM      | 97.7/99.0          | 1.1E-06/1.3E-10 | Siphoviridae.                 |                                                                |                                                              |
| Microcystis   | Mi1MpC5                  | Microcystis phage Ma-LMM01             | YP_851083.1    | 251                | PG_binding_1       | 99.3    | 7.4E-13 |                 |           | Glyco_hydro_19     | 100.0           | 2.8E-41                       | Myoviridae.                                                    |                                                              |
|               | Mi2MpO5                  | Microcystis phage Ma-LMM01 (another)   | YP_851082.1    | 213                | PG_binding_1       | 99.3    | 7.0E-12 | Peptidase_M15_3 | 100.0     | 1.9E-30            |                 |                               | Myoviridae.                                                    |                                                              |
| Mycobacterium | My1SpSC55                | Mycobacterium phage PackMan            | AEK07284.1     | 526                | NLPC_P60.          | 96.8    | 5.3E-04 | PG_binding_1    | 98.8/99.4 | 2.9E-09/1.1E-13    | Glyco_hydro_19  | 100.0                         | 4.3E-38                                                        | Siphoviridae.                                                |
|               | My2SpPG                  | Mycobacterium phage Blue7              | AER48198.1     | 404                | Peptidase_M15_4    | 99.8    | 1.1E-19 | Transglycosylas | 100.0     | 8.3E-31            |                 |                               | Siphoviridae.                                                  |                                                              |
|               | My3SpP55                 | Mycobacterium phage Adjutor            | YP_001936127.1 | 327                | Peptidase_M15_4    | 99.7    | 4.9E-17 | PG_binding_1    | 99.4      | 2.9E-13            | PG_binding_1    | 97.5                          | 4.7E-05                                                        | Siphoviridae.                                                |
|               | My4SpQK5                 | Mycobacterium phage Angel              | YP_002941885.1 | 438                | Peptidase_M23      | 99.9    | 7.6E-24 | Amidase_2       | 99.9      | 7.3E-25            | PG_binding_1    | 99.3                          | 1.4E-12                                                        | Siphoviridae.                                                |
|               | My5SpTC                  | Mycobacterium phage Angelica           | YP_003856908.1 | 551                | Peptidase_C39_2    | 99.7    | 4.4E-17 | Glyco_hydro_19  | 100.0     | 5.4E-38            |                 |                               | Siphoviridae.                                                  |                                                              |
|               | My6XpK                   | Mycobacterium phage Ardmore            | YP_003495170.1 | 384                |                    |         |         |                 |           | Amidase_2          | 99.9            | 4.7E-25                       | Caudovirales.                                                  |                                                              |
|               | My7SpK88                 | Mycobacterium phage Barnyard           | NP_818577.1    | 351                | Amidase_2          | 99.9    | 5.0E-26 |                 |           | LGFP               | 99.6/99.7       | 6.4E-16/1.4E-17               | Siphoviridae.                                                  |                                                              |
|               | My8SpPC                  | Mycobacterium phage Bethlehem          | YP_001491660.1 | 477                | Peptidase_M15_4    | 99.7    | 6.6E-18 | Glyco_hydro_19  | 100.0     | 4.7E-30            |                 |                               | Siphoviridae.                                                  |                                                              |
|               | My9SpKK                  | Mycobacterium phage Boomer             | YP_002014248.1 | 433                |                    |         |         |                 |           | Amidase_2          |                 | 1.0E+02                       | Siphoviridae.                                                  |                                                              |
|               | My10SpQK5                | Mycobacterium phage BPs                | YP_001936055.1 | 438                | Peptidase_M23      | 99.9    | 7.6E-24 | Amidase_2       | 99.9      | 7.3E-25            | PG_binding_1    | 99.3                          | 1.4E-12                                                        | Siphoviridae.                                                |
|               | My11SpP55                | Mycobacterium phage Butterscotch       | YP_002241533.1 | 327                | Peptidase_M15_4    | 99.7    | 4.9E-17 | PG_binding_1    | 99.4      | 2.9E-13            | PG_binding_1    | 97.5                          | 4.7E-05                                                        | Siphoviridae.                                                |
|               | My12SpPC                 | Mycobacterium phage Bxb1               | NP_075275.1    | 565                | Peptidase_M15_4    | 99.7    | 2.5E-18 | Glyco_hydro_19  | 99.9      | 7.3E-30            |                 | 99.5                          | 1.5E-14                                                        | Siphoviridae; L5-like viruses; unclassified L5-like viruses. |
|               | My13MpK                  | Mycobacterium phage Bxz1               | NP_818286.1    | 476                |                    |         |         | Amidase_2       | 99.9      | 2.5E-25            |                 |                               |                                                                | Myoviridae; Bxz1-like phages.                                |
|               | My14SpTC                 | Mycobacterium phage Bxz2               | NP_817599.1    | 514                | Peptidase_C39_2    | 99.8    | 7.2E-18 | Glyco_hydro_19  | 100.0     | 7.8E-40            |                 |                               |                                                                | Siphoviridae.                                                |
|               | My15SpQK5                | Mycobacterium phage Chah               | YP_002241360.1 | 438                | Peptidase_M23      | 99.9    | 5.8E-25 | Amidase_2       | 99.9      | 7.9E-26            | PG_binding_1    | 99.4                          | 1.9E-13                                                        | Siphoviridae.                                                |
|               | My16SpK                  | Mycobacterium phage Che8               | NP_817370.1    | 424                |                    |         |         | Amidase_2       | 99.9      | 9.7E-24            |                 |                               |                                                                | Siphoviridae.                                                |
|               | My17SpP55                | Mycobacterium phage Che9c              | NP_817703.1    | 317                | Peptidase_M15_4    | 99.6    | 1.1E-15 | PG_binding_1    | 99.5      | 1.0E-13            | PG_binding_1    | 97.8                          | 1.0E-05                                                        | Siphoviridae.                                                |
|               | My18SpCK                 | Mycobacterium phage Che9d              | NP_818008.1    | 454                | Glyco_hydro_19     | 100.0   | 1.2E-33 | Amidase_2       | 99.9      | 8.8E-25            |                 |                               |                                                                | Siphoviridae.                                                |
|               | My19SpK                  | Mycobacterium phage Cooper             | YP_654941.1    | 570                |                    |         |         | Amidase_2       | 99.9      | 3.4E-24            |                 |                               |                                                                | Siphoviridae.                                                |
|               | My20SpK                  | Mycobacterium phage Corndog            | NP_817920.1    | 406                |                    |         |         | Amidase_2       | 99.9      | 8.6E-24            |                 |                               |                                                                | Siphoviridae.                                                |
|               | My21SpTC                 | Mycobacterium phage CrimD              | YP_003857002.1 | 551                | Peptidase_C39_2    | 99.7    | 7.3E-17 | Glyco_hydro_19  | 100.0     | 1.7E-37            |                 |                               |                                                                | Siphoviridae.                                                |
|               | My22SpPC                 | Mycobacterium phage DD5                | YP_001994741.1 | 464                | Peptidase_M15_4    | 99.8    | 2.4E-19 | Glyco_hydro_19  | 99.9      | 1.6E-29            |                 |                               |                                                                | Siphoviridae.                                                |
|               | My23MpK                  | Mycobacterium phage ET08               | YP_003347884.1 | 476                |                    |         |         | Amidase_2       | 99.9      | 1.7E-25            |                 |                               |                                                                | Myoviridae; Bxz1-like phages.                                |
|               | My24SpP55                | Mycobacterium phage Faith1             | YP_004538971.1 | 316                | Peptidase_M15_4    | 99.7    | 7.1E-17 | PG_binding_1    | 99.5      | 3.9E-14            | PG_binding_1    | 97.7                          | 2.1E-05                                                        | Siphoviridae.                                                |
|               | My25SpK                  | Mycobacterium phage Fruitloop          | YP_002241714.1 | 384                |                    |         |         | Amidase_2       |           |                    |                 | 99.9                          | 6.6E-25                                                        | Siphoviridae.                                                |

|  |           |                                  |                |     |                 |       |         |                |       |         |                |       |         |                                                            |
|--|-----------|----------------------------------|----------------|-----|-----------------|-------|---------|----------------|-------|---------|----------------|-------|---------|------------------------------------------------------------|
|  | My26SpQK5 | Mycobacterium phage Giles        | YP_001552360.1 | 402 | Peptidase_M23   | 99.9  | 8.3E-22 | Amidase_2      | 99.9  | 6.4E-25 | PG_binding_1   | 99.4  | 2.8E-13 | Siphoviridae.                                              |
|  | My27SpP55 | Mycobacterium phage Gumball      | YP_002241929.1 | 327 | Peptidase_M15_4 | 99.7  | 2.4E-17 | PG_binding_1   | 99.4  | 1.4E-13 | PG_binding_1   | 97.9  | 3.8E-06 | Siphoviridae.                                              |
|  | My28SpQK5 | Mycobacterium phage Halo         | YP_655544.1    | 438 | Peptidase_M23   | 99.9  | 7.6E-24 | Amidase_2      | 99.9  | 7.3E-25 | PG_binding_1   | 99.3  | 1.4E-12 | Siphoviridae.                                              |
|  | My29SpPC  | Mycobacterium phage Jasper       | YP_001994557.1 | 473 | Peptidase_M15_4 | 99.7  | 1.4E-17 | Glyco_hydro_19 | 99.9  | 2.8E-29 |                |       |         | Siphoviridae.                                              |
|  | My30SpPC  | Mycobacterium phage KBG          | YP_001994468.1 | 464 | Peptidase_M15_4 | 99.9  | 2.4E-19 | Glyco_hydro_19 | 99.9  | 1.6E-29 |                |       |         | Siphoviridae.                                              |
|  | My31SpP55 | Mycobacterium phage Konstantine  | YP_002242096.1 | 321 | Peptidase_M15_4 | 99.7  | 4.3E-17 | PG_binding_1   | 99.4  | 1.5E-13 | PG_binding_1   | 97.8  | 9.0E-06 | Siphoviridae.                                              |
|  | My32SpK   | Mycobacterium phage LeBron       | YP_003857156.1 | 390 |                 |       |         | Amidase_2      | 99.9  | 7.3E-24 |                |       |         | Siphoviridae.                                              |
|  | My33SpK   | Mycobacterium phage Llij         | YP_655026.1    | 397 |                 |       |         | Amidase_2      | 99.9  | 7.5E-22 |                |       |         | Siphoviridae.                                              |
|  | My34SpPC  | Mycobacterium phage Lockley      | YP_001994650.1 | 473 | Peptidase_M15_4 | 99.7  | 4.9E-17 | Glyco_hydro_19 | 99.9  | 9.0E-30 |                |       |         | Siphoviridae.                                              |
|  | My35MpPD5 | Mycobacterium phage Myrna        | YP_002225120.1 | 530 | Peptidase_M15_4 | 99.4  | 1.5E-13 | PG_binding_1   | 97.2  | 4.7E-04 | Glyco_hydro_25 | 100.0 | 2.1E-37 | Myoviridae.                                                |
|  | My36SpK   | Mycobacterium phage Nigel        | YP_002003881.1 | 577 |                 |       |         | Amidase_2      | 99.9  | 3.7E-24 |                |       |         | Siphoviridae.                                              |
|  | My37SpSD  | Mycobacterium phage Omega        | NP_818351.1    | 473 | NLPC_P60.       | 99.4  | 1.3E-13 | Glyco_hydro_25 | 100.0 | 8.6E-41 |                |       |         | Siphoviridae.                                              |
|  | My38SpK   | Mycobacterium phage Pacc40       | YP_002241614.1 | 402 |                 |       |         | Amidase_2      | 99.9  | 1.1E-23 |                |       |         | Siphoviridae.                                              |
|  | My39SpPC  | Mycobacterium phage Peaches      | YP_003358711.1 | 500 | Peptidase_M15_4 | 99.7  | 6.9E-18 | Glyco_hydro_19 | 100.0 | 7.0E-34 |                |       |         | Siphoviridae.                                              |
|  | My40SpQK5 | Mycobacterium phage PG1          | NP_943827.1    | 429 | Peptidase_M23   | 99.9  | 1.3E-24 | Amidase_2      | 99.9  | 6.4E-26 | PG_binding_1   | 99.4  | 2.5E-13 | Siphoviridae.                                              |
|  | My41SpK   | Mycobacterium phage Phaerdrus    | YP_002014655.1 | 355 |                 |       |         | Amidase_2      | 99.9  | 6.4E-25 |                |       |         | Siphoviridae.                                              |
|  | My42SpK   | Mycobacterium phage Phlyer       | YP_002564144.1 | 421 |                 |       |         | Amidase_2      | 99.9  | 4.0E-24 |                |       |         | Siphoviridae.                                              |
|  | My43SpK   | Mycobacterium phage Pipefish     | YP_655325.1    | 407 |                 |       |         | Amidase_2      | 99.9  | 2.3E-24 |                |       |         | Siphoviridae.                                              |
|  | My44SpP55 | Mycobacterium phage PLOT         | YP_655415.1    | 327 | Peptidase_M15_4 | 99.7  | 4.9E-17 | PG_binding_1   | 99.4  | 2.9E-13 | PG_binding_1   | 97.5  | 4.7E-05 | Siphoviridae.                                              |
|  | My45SpP55 | Mycobacterium phage Predator     | YP_002003394.1 | 318 | Peptidase_M15_4 | 99.6  | 2.3E-16 | PG_binding_1   | 99.5  | 1.1E-13 | PG_binding_1   | 97.7  | 1.8E-05 | Siphoviridae.                                              |
|  | My46SpPC  | Mycobacterium phage Pukovnik     | YP_001994828.1 | 501 | Peptidase_M15_4 | 99.3  | 1.1E-12 | Glyco_hydro_19 | 100.0 | 1.5E-36 |                |       |         | Siphoviridae.                                              |
|  | My47SpK   | Mycobacterium phage Ramsey       | YP_002241819.1 | 415 |                 |       |         | Amidase_2      | 99.9  | 4.2E-24 |                |       |         | Siphoviridae.                                              |
|  | My48SpPC  | Mycobacterium phage Rosebush     | NP_817807.1    | 503 | Peptidase_M15_4 | 99.7  | 1.4E-18 | Glyco_hydro_19 | 100.0 | 9.1E-35 |                |       |         | Siphoviridae.                                              |
|  | My49MpK   | Mycobacterium phage ScottMcG     | YP_002224239.1 | 476 |                 |       |         | Amidase_2      | 99.9  | 1.7E-25 |                |       |         | Myoviridae; Bx21-like phages.                              |
|  | My50SpPC  | Mycobacterium phage Solon        | YP_002223950.1 | 464 | Peptidase_M15_4 | 99.8  | 2.4E-19 | Glyco_hydro_19 | 100.0 | 3.5E-30 |                |       |         | Siphoviridae.                                              |
|  | My51MpK   | Mycobacterium phage Spud         | YP_002224461.1 | 476 |                 |       |         | Amidase_2      | 99.9  | 2.5E-25 |                |       |         | Myoviridae; I3-like viruses; unclassified I3-like viruses. |
|  | My52SpK   | Mycobacterium phage TM4          | NP_569764.1    | 547 |                 |       |         |                |       |         | Amidase_2      | 99.9  | 4.4E-24 | Siphoviridae.                                              |
|  | My53SpP55 | Mycobacterium phage Troll4       | YP_002241449.1 | 327 | Peptidase_M15_4 | 99.7  | 2.8E-17 | PG_binding_1   | 99.4  | 4.2E-13 | PG_binding_1   | 97.5  | 4.2E-05 | Siphoviridae.                                              |
|  | My54SpK   | Mycobacterium phage Tweety       | YP_001469263.1 | 403 |                 |       |         |                |       |         | Amidase_2      | 99.9  | 4.4E-24 | Siphoviridae.                                              |
|  | My55SpPC  | Mycobacterium phage U2           | YP_001491578.1 | 477 | Peptidase_M15_4 | 99.7  | 6.2E-17 | Glyco_hydro_19 | 100.0 | 3.3E-31 |                |       |         | Siphoviridae.                                              |
|  | My56SpK   | Mycobacterium phage Wee          | YP_004123853.1 | 384 |                 |       |         |                |       |         | Amidase_2      | 99.9  | 5.0E-25 | Siphoviridae.                                              |
|  | My57SpCK  | Mycobacterium phage Wildcat      | YP_655914.1    | 502 | Glyco_hydro_19  | 100.0 | 1.2E-33 | Amidase_2      | 99.9  | 1.7E-24 |                |       |         | Siphoviridae.                                              |
|  | My58SpTC  | Mycobacterium phage Wonder       | ADX30647.1     | 513 | Peptidase_C39_2 | 99.8  | 4.0E-18 | Glyco_hydro_19 | 100.0 | 1.8E-38 |                |       |         | Siphoviridae.                                              |
|  | My59SpPC  | Mycobacterium phage Shaka        | AEF57318.1     | 500 | Peptidase_M15_4 | 99.7  | 6.5E-18 | Glyco_hydro_19 | 100.0 | 1.5E-33 |                |       |         | Siphoviridae.                                              |
|  | My60SpQK5 | Mycobacterium phage Thora        | AEJ91838.1     | 437 | Peptidase_M23   | 99.9  | 7.3E-25 | Amidase_2      | 99.9  | 9.8E-26 | PG_binding_1   | 99.4  | 1.0E-13 | Siphoviridae.                                              |
|  | My61SpPC  | Mycobacterium phage BPBiabs31    | AEJ91909.1     | 477 | Peptidase_M15_4 | 99.7  | 1.7E-17 | Glyco_hydro_19 | 100.0 | 4.9E-30 |                |       |         | Siphoviridae.                                              |
|  | My62SpTC  | Mycobacterium phage HelDan       | AEJ92003.1     | 521 | Peptidase_C39_2 | 99.8  | 1.5E-18 | Glyco_hydro_19 | 100.0 | 9.6E-40 |                |       |         | Siphoviridae.                                              |
|  | My63SpSD7 | Mycobacterium phage Optimus      | AEJ92132.1     | 477 | NLPC_P60.       | 99.8  | 2.5E-09 | Glyco_hydro_25 | 100.0 | 7.1E-40 | Cpl-7          | 98.8  | 2.1E-09 | Siphoviridae.                                              |
|  | My64SpPL  | Mycobacterium phage Timshel      | AEJ92323.1     | 450 | Peptidase_M15_4 | 99.6  | 8.2E-16 |                |       |         | NlpD           | 97.8  | 2.0E-05 | Siphoviridae.                                              |
|  | My65SpPC  | Mycobacterium phage MrGordo      | AEJ92897.1     | 470 | Peptidase_M15_4 | 99.8  | 7.8E-19 | Glyco_hydro_19 | 100.0 | 1.1E-30 |                |       |         | Siphoviridae.                                              |
|  | My66SpK   | Mycobacterium phage Shauna1      | AEJ93006.1     | 384 |                 |       |         |                |       |         | Amidase_2      | 99.9  | 5.2E-25 | Siphoviridae.                                              |
|  | My67SpK   | Mycobacterium phage Mutaforma13  | AEJ93116.1     | 423 |                 |       |         |                |       |         | Amidase_2      | 99.9  | 5.8E-24 | Siphoviridae.                                              |
|  | My68SpK   | Mycobacterium phage ShiLan       | AEJ93222.1     | 398 |                 |       |         | Amidase_2      | 99.9  | 3.2E-23 |                |       |         | Siphoviridae.                                              |
|  | My69SpP55 | Mycobacterium phage Benedict     | AEJ93402.1     | 313 | Peptidase_M15_4 | 99.5  | 2.6E-14 | PG_binding_1   | 99.4  | 2.5E-13 |                |       |         | Siphoviridae.                                              |
|  | My70SpP55 | Mycobacterium phage Airmid       | AEJ93493.1     | 313 | Peptidase_M15_4 | 99.5  | 1.7E-14 | PG_binding_1   | 99.4  | 2.4E-13 | PG_binding_1   | 97.4  | 7.6E-05 | Siphoviridae.                                              |
|  | My71SpPC  | Mycobacterium phage Doom         | AEJ93585.1     | 477 | Peptidase_M15_4 | 99.7  | 1.8E-18 | Glyco_hydro_19 | 100.0 | 1.8E-30 |                |       |         | Siphoviridae.                                              |
|  | My72SpPC  | Mycobacterium phage Euphoria     | AEJ93670.1     | 473 | Peptidase_M15_4 | 99.7  | 1.8E-17 | Glyco_hydro_19 | 99.9  | 1.2E-28 |                |       |         | Siphoviridae.                                              |
|  | My73SpTC  | Mycobacterium phage JAWS         | AEJ93784.1     | 551 | Peptidase_C39_2 | 99.7  | 3.1E-17 | Glyco_hydro_19 | 100.0 | 3.0E-38 |                |       |         | Siphoviridae.                                              |
|  | My74SpQK5 | Mycobacterium phage Oline        | AEJ93886.1     | 431 | Peptidase_M23   | 99.9  | 8.2E-25 | Amidase_2      | 99.9  | 1.2E-25 | PG_binding_1   | 99.4  | 1.4E-13 | Siphoviridae.                                              |
|  | My75SpPC  | Mycobacterium phage Thibault     | AEJ93989.1     | 457 | Peptidase_M15_4 | 99.7  | 5.5E-18 | Glyco_hydro_19 | 100.0 | 1.1E-36 |                |       |         | Siphoviridae.                                              |
|  | My76XpPC  | Mycobacterium phage Backyardigan | AEJ94495.1     | 498 | Peptidase_M15_4 | 99.6  | 1.6E-15 | Glyco_hydro_19 | 100.0 | 1.9E-33 |                |       |         | Viruses; unclassified phages.                              |
|  | My77XpK   | Mycobacterium phage ChrisnMich   | AEJ94646.1     | 578 |                 |       |         | Amidase_2      | 99.9  | 1.6E-23 |                |       |         | Viruses; unclassified phages.                              |
|  | My78SpK   | Mycobacterium phage Daisy        | AEJ94718.1     | 421 |                 |       |         | Amidase_2      | 99.9  | 3.5E-24 |                |       |         | Siphoviridae.                                              |
|  | My79XpTC  | Mycobacterium phage JHC117       | AEJ95108.1     | 514 | Peptidase_C39_2 | 99.8  | 7.7E-18 | Glyco_hydro_19 | 100.0 | 1.3E-38 |                |       |         | Viruses; unclassified phages.                              |
|  | My80XpQK5 | Mycobacterium phage KLucky39     | AEJ95234.1     | 435 | Peptidase_M23   | 99.9  | 3.5E-24 | Amidase_2      | 99.9  | 8.4E-26 | PG_binding_1   | 99.5  | 9.3E-14 | Viruses; unclassified phages.                              |
|  | My81XpK   | Mycobacterium phage Marvin       | AEJ95335.1     | 459 |                 |       |         | Amidase_2      | 99.9  | 3.2E-24 |                |       |         | Viruses; unclassified phages.                              |
|  | My82XpQK5 | Mycobacterium phage Phipps       | AEJ95524.1     | 438 | Peptidase_M23   | 99.9  | 7.8E-25 | Amidase_2      | 99.9  | 1.2E-25 | PG_binding_1   | 99.4  | 4.8E-13 | Viruses; unclassified phages.                              |
|  | My83XpQK5 | Mycobacterium phage Vortex       | AEJ95624.1     | 451 | Peptidase_M23   | 99.9  | 1.0E-24 | Amidase_2      | 99.9  | 1.0E-25 | PG_binding_1   | 99.4  | 3.5E-13 | Viruses; unclassified phages.                              |
|  | My84XpK   | Mycobacterium phage Zemanar      | AEJ95718.1     | 578 |                 |       |         | Amidase_2      | 99.9  | 6.3E-24 |                |       |         | Viruses; unclassified phages.                              |
|  | My85XpTC  | Mycobacterium phage Adephagia    | AEJ95799.1     | 551 | Peptidase_C39_2 | 99.7  | 2.0E-17 | Glyco_hydro_19 | 100.0 | 4.1E-37 |                |       |         | Viruses; unclassified phages.                              |
|  | My86XpK   | Mycobacterium phage RockyHorror  | AEK06739.1     | 397 |                 |       |         |                |       |         | Amidase_2      | 99.9  | 5.4E-24 | Viruses; unclassified phages.                              |
|  | My87XpQK5 | Mycobacterium phage Oosterbaan   | AEK07211.1     | 438 | Peptidase_M23   | 99.9  | 4.5E-25 | Amidase_2      | 99.9  | 1.0E-25 | PG_binding_1   | 99.4  | 1.9E-13 | Viruses; unclassified phages.                              |
|  | My88XpTC  | Mycobacterium phage Rockstar     | AEK07375.1     | 521 | Peptidase_C39_2 | 99.8  | 1.1E-18 | Glyco_hydro_19 | 100.0 | 1.3E-40 |                |       |         | Viruses; unclassified phages.                              |
|  | My89SpPC  | Mycobacterium phage Send513      | AEK07481.1     | 489 | Peptidase_M15_4 | 99.7  | 1.1E-17 | Glyco_hydro_19 | 100.0 | 8.2E-32 |                |       |         | Siphoviridae.                                              |
|  | My90XpK   | Mycobacterium phage UPIE         | AEK07569.1     | 390 |                 |       |         | Amidase_2      | 99.9  | 1.3E-23 |                |       |         | Viruses; unclassified phages.                              |
|  | My91XpTC  | Mycobacterium phage Vix          | AEK07673.1     | 514 | Peptidase_C39_2 | 99.8  | 1.3E-17 | Glyco_hydro_19 | 100.0 | 2.7E-38 |                |       |         | Viruses; unclassified phages.                              |
|  | My92SpTC  | Mycobacterium phage Anaya        | AEK07990.1     | 551 | Peptidase_C39_2 | 99.7  | 3.7E-17 | Glyco_hydro_19 | 100.0 | 2.4E-36 |                |       |         | Siphoviridae.                                              |
|  | My93XpSD7 | Mycobacterium phage Baka         | AEK08108.1     | 477 | NLPC_P60.       | 99.8  | 3.5E-09 | Glyco_hydro_25 | 100.0 | 5.2E-40 | Cpl-7          | 98.9  | 1.0E-09 | Viruses; unclassified phages.                              |
|  | My94XpQK5 | Mycobacterium phage Harvey       | AEK08800.1     | 442 | Peptidase_M23   | 99.9  | 2.6E-24 | Amidase_2      | 99.9  | 1.7E-25 | PG_binding_1   | 99.4  | 2.3E-13 | Viruses; unclassified phages.                              |
|  | My95XpK   | Mycobacterium phage Ibhuesi      | AEK09126.1     | 397 |                 |       |         | Amidase_2      | 99.9  | 4.2E-24 |                |       |         | Viruses; unclassified phages.                              |
|  | My96XpPC  | Mycobacterium phage JC27         | AEK09209.1     | 476 | Peptidase_M15_4 | 99.7  | 1.5E-17 | Glyco_hydro_19 | 100.0 | 2.0E-31 |                |       |         | Viruses; unclassified phages.                              |
|  | My97XpPC  | Mycobacterium phage Lesedi       | AEK09304.1     | 477 | Peptidase_M15_4 | 99.7  | 1.7E-18 | Glyco_hydro_19 | 100.0 | 1.4E-29 |                |       |         | Viruses; unclassified phages.                              |
|  | My98SpSD  | Mycobacterium phage LittleE      | AEK09434.1     | 472 | NLPC_P60.       | 99.7  | 4.2E-18 | Glyco_hydro_25 | 100.0 | 2.2E-40 |                |       |         | Siphoviridae.                                              |
|  | My99SpK   | Mycobacterium phage Mozy         | AEK09645.1     | 396 |                 |       |         | Amidase_2      | 99.9  | 6.3E-24 |                |       |         | Siphoviridae.                                              |
|  | My100XpPC | Mycobacterium phage Museum       | AEK09730.1     | 477 | Peptidase_M15_4 | 99.7  | 4.2E-17 | Glyco_hydro_19 | 100.0 | 1.3E-30 |                |       |         | Viruses; unclassified phages.                              |
|  | My101XpK  | Mycobacterium phage Rey          | AEK09952.1     | 471 |                 |       |         | Amidase_2      | 99.8  | 6.5E-22 |                |       |         | Viruses; unclassified phages.                              |

Mycobacterium

|            |                                     |             |     |                 |       |         |                 |           |                 |                |       |         |                                                            |
|------------|-------------------------------------|-------------|-----|-----------------|-------|---------|-----------------|-----------|-----------------|----------------|-------|---------|------------------------------------------------------------|
| My102XpPC  | Mycobacterium phage KSSJEB          | AEK10501.1  | 477 | Peptidase_M15_4 | 99.7  | 5.8E-17 | Glyco_hydro_19  | 100.0     | 2.0E-30         |                |       |         | Viruses; unclassified phages.                              |
| My103SpP5  | Mycobacterium phage George          | AEK32601.1  | 305 | Peptidase_M15_4 | 99.4  | 1.6E-13 | PG_binding_1    | 99.4      | 1.2E-13         |                |       |         | Siphoviridae.                                              |
| My104XpP5  | Mycobacterium phage Cuco            | AEL17657.1  | 305 | Peptidase_M15_4 | 99.4  | 1.9E-13 | PG_binding_1    | 99.4      | 2.4E-13         |                |       |         | Caudovirales.                                              |
| My105SpPG  | Mycobacterium phage Turbido         | AEL17748.1  | 437 | Peptidase_M15_4 | 99.6  | 8.4E-16 | Transglycosylas | 99.3      | 3.5E-12         |                |       |         | Siphoviridae.                                              |
| My106SpPC  | Mycobacterium phage MeeZee          | AEL19763.1  | 500 | Peptidase_M15_4 | 99.7  | 6.8E-18 | Glyco_hydro_19  | 100.0     | 8.0E-35         |                |       |         | Siphoviridae.                                              |
| My107SpTC  | Mycobacterium phage Charlie         | AEL19956.1  | 502 | Peptidase_C39_2 | 99.0  | 7.1E-11 | Glyco_hydro_19  | 100.0     | 1.9E-38         |                |       |         | Siphoviridae.                                              |
| My108XpK   | Mycobacterium phage Gumbie          | AEL20025.1  | 397 |                 |       |         | Amidase_2       | 99.9      | 3.3E-24         |                |       |         | Caudovirales.                                              |
| My109MpK   | Mycobacterium phage Dandelion       | AEL97890.1  | 476 |                 |       |         | Amidase_2       | 99.9      | 1.7E-25         |                |       |         | Myoviridae; I3-like viruses; unclassified I3-like viruses. |
| My110SpK   | Mycobacterium phage Patience        | AEL97950.1  | 463 |                 |       |         | Amidase_2       | 99.9      | 1.7E-24         |                |       |         | Siphoviridae.                                              |
| My111SpP5  | Mycobacterium phage BigNuz          | AEL98189.1  | 315 | Peptidase_M15_4 | 99.6  | 2.1E-16 | PG_binding_1    | 99.4      | 2.2E-13         |                |       |         | Siphoviridae.                                              |
| My112SpPC  | Mycobacterium phage Perseus         | AEM91647.1  | 477 | Peptidase_M15_4 | 99.7  | 1.7E-18 | Glyco_hydro_19  | 100.0     | 1.1E-30         |                |       |         | Siphoviridae.                                              |
| My113SpPC  | Mycobacterium phage AnnaL29         | AEN70171.1  | 503 | Peptidase_M15_4 | 99.7  | 1.4E-18 | Glyco_hydro_19  | 100.0     | 8.9E-34         |                |       |         | Siphoviridae.                                              |
| My114SpTC  | Mycobacterium phage Redi            | AEN79885.1  | 499 | Peptidase_C39_2 | 99.1  | 4.2E-11 | Glyco_hydro_19  | 100.0     | 1.3E-38         |                |       |         | Siphoviridae.                                              |
| My115SpQK5 | Mycobacterium phage Murdoc          | AEO93984.1  | 438 | Peptidase_M23   | 99.9  | 2.1E-24 | Amidase_2       | 99.9      | 1.1E-25         | PG_binding_1   | 99.4  | 2.5E-13 | Siphoviridae.                                              |
| My116SpQK  | Mycobacterium phage Morgushi        | AEO94081.1  | 300 | Peptidase_M23   | 99.9  | 4.2E-25 | Amidase_2       | 99.8      | 3.1E-21         |                |       |         | Siphoviridae.                                              |
| My117SpTC  | Mycobacterium phage BarrelRoll      | AEO94172.1  | 551 | Peptidase_C39_2 | 99.7  | 6.2E-16 | Glyco_hydro_19  | 100.0     | 2.1E-37         |                |       |         | Siphoviridae.                                              |
| My118SpPC  | Mycobacterium phage Dreamboat       | AEO94248.1  | 489 | Peptidase_M15_4 | 99.7  | 2.6E-17 | Glyco_hydro_19  | 100.0     | 4.3E-33         |                |       |         | Siphoviridae.                                              |
| My119SpK   | Mycobacterium phage Rumpelstiltskin | AEO94359.1  | 389 |                 |       |         | Amidase_2       | 99.9      | 2.3E-24         |                |       |         | Siphoviridae.                                              |
| My120SpK   | Mycobacterium phage DotProduct      | AER14077.1  | 397 |                 |       |         | Amidase_2       | 99.9      | 1.0E-24         |                |       |         | Siphoviridae.                                              |
| My121MpK   | Mycobacterium phage MoMoMixon       | AER25808.1  | 476 |                 |       |         | Amidase_2       | 99.9      | 2.2E-25         | PG_binding_1   | 98.1  | 2.9E-06 | Myoviridae; I3-like viruses; unclassified I3-like viruses. |
| My122SpK   | Mycobacterium phage Bongo           | AER26088.1  | 455 |                 |       |         | Amidase_2       | 99.9      | 9.3E-24         |                |       |         | Siphoviridae.                                              |
| My123SpP   | Mycobacterium phage Saintus         | AER26391.1  | 225 |                 |       |         | Peptidase_M15_4 | 99.8      | 3.2E-19         |                |       |         | Siphoviridae.                                              |
| My124SpPC  | Mycobacterium phage Hedgerow        | AER47278.1  | 499 | Peptidase_M15_4 | 99.7  | 1.4E-18 | Glyco_hydro_19  | 100.0     | 2.5E-37         |                |       |         | Siphoviridae.                                              |
| My125SpK   | Mycobacterium phage Gadjet          | AER47371.1  | 425 |                 |       |         | Amidase_2       | 99.9      | 3.8E-24         |                |       |         | Siphoviridae.                                              |
| My126SpK   | Mycobacterium phage Firecracker     | AER47493.1  | 416 |                 |       |         | Amidase_2       | 99.9      | 5.7E-24         |                |       |         | Siphoviridae.                                              |
| My127SpCK  | Mycobacterium phage DS6A            | AER47584.1  | 486 | Glyco_hydro_19  | 100.0 | 1.7E-37 | Amidase_2       | 99.9      | 3.5E-24         |                |       |         | Siphoviridae.                                              |
| My128SpPC  | Mycobacterium phage Courthouse      | AER47898.1  | 461 | Peptidase_M15_4 | 99.7  | 6.1E-18 | Glyco_hydro_19  | 100.0     | 2.4E-36         |                |       |         | Siphoviridae.                                              |
| My129SpPC  | Mycobacterium phage Bruns           | AER48099.1  | 473 | Peptidase_M15_4 | 99.7  | 1.3E-17 | Glyco_hydro_19  | 99.9      | 1.8E-29         |                |       |         | Siphoviridae.                                              |
| My130SpP55 | Mycobacterium phage Babsiella       | AER48403.1  | 317 | Peptidase_M15_4 | 99.6  | 2.3E-16 | PG_binding_1    | 99.5      | 5.2E-14         | PG_binding_1   | 97.9  | 1.8E-06 | Siphoviridae.                                              |
| My131SpPC  | Mycobacterium phage Ares            | AER48669.1  | 499 | Peptidase_M15_4 | 99.7  | 1.4E-18 | Glyco_hydro_19  | 100.0     | 7.5E-37         |                |       |         | Siphoviridae.                                              |
| My132SpTK5 | Mycobacterium phage Acadian         | AER48961.1  | 520 | Peptidase_C39_2 | 99.8  | 4.5E-18 | Amidase_2       | 99.9      | 9.0E-24         | PG_binding_1   | 99.3  | 2.5E-12 | Siphoviridae.                                              |
| My133SpQK5 | Mycobacterium phage Vista           | AER49059.1  | 430 | Peptidase_M23   | 99.9  | 1.1E-24 | Amidase_2       | 99.9      | 1.3E-25         | PG_binding_1   | 99.4  | 2.6E-13 | Siphoviridae.                                              |
| My134SpK   | Mycobacterium phage SG4             | AER49440.1  | 423 |                 |       |         | Amidase_2       | 99.9      | 1.2E-24         |                |       |         | Siphoviridae.                                              |
| My135SpP55 | Mycobacterium phage Nova            | AER49788.1  | 327 | Peptidase_M15_4 | 99.7  | 1.4E-16 | PG_binding_1    | 99.4      | 2.1E-13         | PG_binding_1   | 97.5  | 4.9E-05 | Siphoviridae.                                              |
| My136SpPC  | Mycobacterium phage LHTSCC          | AER49848.1  | 493 | Peptidase_M15_4 | 99.5  | 5.5E-15 | Glyco_hydro_19  | 100.0     | 6.7E-30         |                |       |         | Siphoviridae.                                              |
| My137SpK   | Mycobacterium phage Kamiyu          | AER50177.1  | 442 |                 |       |         | Amidase_2       | 99.9      | 5.0E-24         |                |       |         | Siphoviridae.                                              |
| My138SpK   | Mycobacterium phage Fezzik          | AEZ50709.1  | 390 |                 |       |         | Amidase_2       | 99.9      | 8.5E-24         |                |       |         | Siphoviridae.                                              |
| My139SpK   | Mycobacterium phage Spartacus       | AFA45040.1  | 430 |                 |       |         | Amidase_2       | 99.9      | 3.6E-24         |                |       |         | Siphoviridae.                                              |
| My140SpQK5 | Mycobacterium phage Colbert         | ACU41194.1  | 433 | Peptidase_M23   | 99.9  | 1.9E-24 | Amidase_2       | 99.9      | 7.0E-26         | PG_binding_1   | 99.4  | 5.9E-13 | Siphoviridae.                                              |
| My141SpQK5 | Mycobacterium phage Puhlonio        | ACU41885.1  | 438 | Peptidase_M23   | 99.9  | 3.1E-24 | Amidase_2       | 99.9      | 7.7E-26         | PG_binding_1   | 99.4  | 1.4E-13 | Siphoviridae.                                              |
| My142SpQK5 | Mycobacterium phage UncleHowie      | ACU42125.1  | 438 | Peptidase_M23   | 99.9  | 3.5E-25 | Amidase_2       | 99.9      | 5.1E-26         | PG_binding_1   | 99.4  | 1.9E-13 | Siphoviridae.                                              |
| My143SpPC  | Mycobacterium phage SkiPole         | ADA83737.1  | 470 | Peptidase_M15_4 | 99.8  | 5.4E-19 | Glyco_hydro_19  | 100.0     | 3.3E-31         |                |       |         | Siphoviridae.                                              |
| My144SpPC  | Mycobacterium phage Eagle           | ADL71267.1  | 500 | Peptidase_M15_4 | 99.7  | 6.9E-18 | Glyco_hydro_19  | 100.0     | 2.8E-33         |                |       |         | Siphoviridae.                                              |
| My145SpPG  | Mycobacterium phage EricB           | AEJ93309.1  | 403 | Peptidase_M15_4 | 99.8  | 7.8E-20 | Transglycosylas | 99.9      | 1.8E-28         |                |       |         | Siphoviridae.                                              |
| My146XpPG  | Mycobacterium phage Gladiator       | AEJ95014.1  | 404 | Peptidase_M15_4 | 99.8  | 1.0E-19 | Transglycosylas | 100.0     | 1.1E-31         |                |       |         | Viruses; unclassified phages.                              |
| My147XpPG  | Mycobacterium phage DaVinci         | AEK08456.1  | 403 | Peptidase_M15_4 | 99.8  | 1.1E-19 | Transglycosylas | 100.0     | 5.6E-34         |                |       |         | Viruses; unclassified phages.                              |
| My148XpPG  | Mycobacterium phage Hammer          | AEK08659.1  | 404 | Peptidase_M15_4 | 99.8  | 4.9E-20 | Transglycosylas | 100.0     | 5.5E-30         |                |       |         | Viruses; unclassified phages.                              |
| My149SpSG  | Mycobacterium phage Trixie          | AEL17842.1  | 431 | NLPC_P60.       | 97.7  | 2.3E-05 | Transglycosylas | 99.8      | 3.8E-22         |                |       |         | Siphoviridae.                                              |
| My149SpSG  | Mycobacterium phage Trixie          | AEL17842.2  | 432 | NLPC_P60.       | 97.8  | 1.0E+00 | Transglycosylas | 99.9      | 1.0E+00         |                |       |         | Siphoviridae.                                              |
| My149SpSG  | Mycobacterium phage Trixie          | AEL17842.3  | 433 | NLPC_P60.       | 97.9  | 2.0E+00 | Transglycosylas | 99.10     | 2.0E+00         |                |       |         | Siphoviridae.                                              |
| My149SpSG  | Mycobacterium phage Trixie          | AEL17842.4  | 434 | NLPC_P60.       | 97.10 | 3.0E+00 | Transglycosylas | 99.11     | 3.0E+00         |                |       |         | Siphoviridae.                                              |
| My149SpSG  | Mycobacterium phage Trixie          | AEL17842.5  | 435 | NLPC_P60.       | 97.11 | 4.0E+00 | Transglycosylas | 99.12     | 4.0E+00         |                |       |         | Siphoviridae.                                              |
| My154SpSC  | Mycobacterium phage D29             | NP_046825.1 | 514 | NLPC_P60.       | 97.1  | 1.9E-04 | Glyco_hydro_19  | 100.0     | 5.9E-35         |                |       |         | Siphoviridae; L5-like viruses                              |
| My155SpPC  | Mycobacterium phage Kugel           | AER49942.1  | 470 | Peptidase_M15_4 | 99.7  | 1.3E-18 | Glyco_hydro_19  | 99.9      | 1.4E-28         |                |       |         | Siphoviridae.                                              |
| My156XpPC  | Mycobacterium phage RidgeCB         | AEL20108.1  | 473 | Peptidase_M15_4 | 99.6  | 7.2E-16 | Glyco_hydro_19  | 99.9      | 1.7E-28         |                |       |         | Caudovirales.                                              |
| My157XpPC  | Mycobacterium phage Switzer         | AEK10308.1  | 477 | Peptidase_M15_4 | 99.7  | 1.3E-17 | Glyco_hydro_19  | 99.9      | 6.5E-28         |                |       |         | Viruses; unclassified phages.                              |
| My158SpSC  | Mycobacteriophage Che12             | ABE67330.1  | 455 | NLPC_P60.       | 99.8  | 1.0E-21 | Glyco_hydro_19  | 100.0     | 1.5E-36         |                |       |         | Siphoviridae.                                              |
| My159SpSC  | Mycobacteriophage RedRock           | ADB93705.1  | 493 | NLPC_P60.       | 97.2  | 1.9E-04 | Glyco_hydro_19  | 100.0     | 8.0E-35         |                |       |         | Siphoviridae.                                              |
| My160XpTC  | Mycobacterium phage Microwolf       | AEJ95400.1  | 514 | Peptidase_C39_2 | 99.8  | 3.5E-18 | Glyco_hydro_19  | 100.0     | 3.4E-39         |                |       |         | Viruses; unclassified phages.                              |
| My161SpPC  | Mycobacterium phage TiroTheta9      | AEM05875.1  | 500 | Peptidase_M15_4 | 99.3  | 1.1E-12 | Glyco_hydro_19  | 99.9      | 1.3E-28         |                |       |         | Siphoviridae.                                              |
| My162SpPC  | Mycobacterium phage Wile            | AEL19851.1  | 498 | Peptidase_M15_4 | 99.1  | 6.9E-11 | Glyco_hydro_19  | 99.9      | 2.8E-29         |                |       |         | Siphoviridae.                                              |
| My163SpC55 | Mycobacterium phage Alma            | AER48722.1  | 526 |                 |       |         | PG_binding_1    | 97.7/99.5 | 1.3E-05/4.8E-14 | Glyco_hydro_19 | 100.0 | 6.5E-37 | Siphoviridae.                                              |
| My164XpQK5 | Mycobacterium phage ABU             | AEJ94215.1  | 438 | Peptidase_M23   | 99.9  | 1.3E-25 | Amidase_2       | 99.9      | 9.7E-26         | PG_binding_1   | 99.4  | 1.0E-13 | Viruses; unclassified phages.                              |
| My165SpQK5 | Mycobacterium phage Fang            | ADA83875.1  | 438 | Peptidase_M23   | 99.9  | 1.3E-25 | Amidase_2       | 99.9      | 9.7E-26         | PG_binding_1   | 99.4  | 1.0E-13 | Siphoviridae.                                              |
| My166XpQK5 | Mycobacterium phage Hertubise       | AEK09042.1  | 438 | Peptidase_M23   | 99.9  | 1.0E-25 | Amidase_2       | 99.9      | 8.0E-26         | PG_binding_1   | 99.5  | 8.7E-14 | Viruses; unclassified phages.                              |
| My167SpQK5 | Mycobacterium phage IsaacEli        | AER47176.1  | 429 | Peptidase_M23   | 99.9  | 8.0E-26 | Amidase_2       | 99.9      | 7.6E-26         | PG_binding_1   | 99.5  | 7.2E-14 | Siphoviridae.                                              |
| My168XpQK5 | Mycobacterium phage JacAttac        | AER47075.1  | 429 | Peptidase_M23   | 99.9  | 8.0E-26 | Amidase_2       | 99.9      | 7.6E-26         | PG_binding_1   | 99.5  | 7.2E-14 | Caudovirales.                                              |
| My169SpQK5 | Mycobacterium phage Kikipoo         | AER50076.1  | 429 | Peptidase_M23   | 99.9  | 1.8E-25 | Amidase_2       | 99.9      | 7.6E-26         | PG_binding_1   | 99.5  | 7.2E-14 | Siphoviridae.                                              |
| My170SpQK5 | Mycobacteriophage Orion             | ABD58365.1  | 429 | Peptidase_M23   | 99.9  | 8.0E-26 | Amidase_2       | 99.9      | 7.6E-26         | PG_binding_1   | 99.5  | 7.2E-14 | Siphoviridae.                                              |
| My171SpQK5 | Mycobacterium phage Osmaximus       | AEJ92824.1  | 438 | Peptidase_M23   | 99.9  | 1.3E-25 | Amidase_2       | 99.9      | 9.7E-26         | PG_binding_1   | 99.4  | 1.0E-13 | Siphoviridae.                                              |
| My172SpQK5 | Mycobacterium phage Scoot17C        | ADA83978.1  | 429 | Peptidase_M23   | 99.9  | 8.0E-26 | Amidase_2       | 99.9      | 7.6E-26         | PG_binding_1   | 99.5  | 7.2E-14 | Siphoviridae.                                              |
| My173SpQK5 | Mycobacterium phage Serendipity     | AEJ92723.1  | 438 | Peptidase_M23   | 99.9  | 1.7E-25 | Amidase_2       | 99.9      | 2.1E-25         | PG_binding_1   | 99.5  | 4.7E-14 | Siphoviridae.                                              |
| My174SpQK5 | Mycobacterium phage TallGRassMM     | AER49259.1  | 438 | Peptidase_M23   | 99.9  | 1.7E-25 | Amidase_2       | 99.9      | 2.1E-25         | PG_binding_1   | 99.5  | 4.7E-14 | Siphoviridae.                                              |
| My175SpQK5 | Mycobacterium phage ThreeOh3D2      | AER49161.1  | 429 | Peptidase_M23   | 99.9  | 8.0E-26 | Amidase_2       | 99.9      | 7.6E-26         | PG_binding_1   | 99.5  | 7.2E-14 | Siphoviridae.                                              |
| My176XpQK5 | Mycobacterium phage Yoshand         | AEK10439.1  | 438 | Peptidase_M23   | 99.9  | 1.3E-25 | Amidase_2       | 99.9      | 9.7E-26         | PG_binding_1   | 99.4  | 1.0E-13 | Viruses; unclassified phages.                              |
| My177SpPC  | Mycobacterium phage Arbitr          | AEN79544.1  | 503 | Peptidase_M15_4 | 99.5  | 5.1E-15 | Glyco_hydro_19  | 100.0     | 1.5E-37         |                |       |         | Siphoviridae.                                              |

|                |                   |                                     |                               |                |                 |                 |           |                 |                |              |                 |         |         |                                                            |                               |                              |
|----------------|-------------------|-------------------------------------|-------------------------------|----------------|-----------------|-----------------|-----------|-----------------|----------------|--------------|-----------------|---------|---------|------------------------------------------------------------|-------------------------------|------------------------------|
| Mycobacterium  | My178SpPC         | Mycobacteriophage Qyrzula           | ABE67464.1                    | 503            | Peptidase_M15_4 | 99.5            | 5.1E-15   | Glyco_hydro_19  | 100.0          | 1.5E-37      |                 |         |         | Siphoviridae.                                              |                               |                              |
|                | My179SpK          | Mycobacterium phage Akoma           | AER48856.1                    | 421            |                 |                 | Amidase_2 | 99.9            | 3.0E-24        |              |                 |         |         | Siphoviridae.                                              |                               |                              |
|                | My180SpK          | Mycobacterium phage Athena          | AER48563.1                    | 425            |                 |                 | Amidase_2 | 99.9            | 3.0E-24        |              |                 |         |         | Siphoviridae.                                              |                               |                              |
|                | My181SpK          | Mycobacterium phage Stinger         | AER49357.1                    | 577            |                 |                 | Amidase_2 | 99.9            | 6.1E-24        |              |                 |         |         | Siphoviridae.                                              |                               |                              |
|                | My182MpK          | Mycobacterium phage Alice           | AEJ94458.1                    | 476            |                 |                 | Amidase_2 | 99.9            | 3.6E-25        |              |                 |         |         | Myoviridae.                                                |                               |                              |
|                | My183MpK          | Mycobacterium phage Cali            | ACH63191.1                    | 476            |                 |                 | Amidase_2 | 99.9            | 8.3E-25        |              |                 |         |         | Myoviridae; I3-like viruses; unclassified I3-like viruses. |                               |                              |
|                | My184MpK          | Mycobacteriophage Catera            | ABE67955.1                    | 476            |                 |                 | Amidase_2 | 99.9            | 3.2E-25        |              |                 |         |         | Myoviridae; I3-like viruses; unclassified I3-like viruses. |                               |                              |
|                | My185MpK          | Mycobacterium phage Drazdys         | AEK06999.1                    | 476            |                 |                 | Amidase_2 | 99.9            | 3.2E-25        |              |                 |         |         | Myoviridae; I3-like viruses; unclassified I3-like viruses. |                               |                              |
|                | My186MpK          | Mycobacterium phage Ghost           | AEJ94976.1                    | 476            |                 |                 | Amidase_2 | 99.9            | 3.2E-25        |              |                 |         |         | Myoviridae.                                                |                               |                              |
|                | My187MpK          | Mycobacterium phage LinStu          | AEL98452.1                    | 476            |                 |                 | Amidase_2 | 99.9            | 2.1E-25        |              |                 |         |         | Myoviridae; I3-like viruses; unclassified I3-like viruses. |                               |                              |
|                | My188MpK          | Mycobacterium phage LRRHood         | ACU41735.1                    | 476            |                 |                 | Amidase_2 | 99.9            | 3.2E-25        |              |                 |         |         | Myoviridae; I3-like viruses; unclassified I3-like viruses. |                               |                              |
|                | My189MpK5         | Mycobacterium phage Nappy           | AER26041.1                    | 476            |                 |                 | Amidase_2 | 99.9            | 5.8E-25        | PG_binding_1 | 98.1            | 4.1E-06 |         | Myoviridae; I3-like viruses; unclassified I3-like viruses. |                               |                              |
|                | My190MpK          | Mycobacterium phage Pio             | AER49734.1                    | 476            |                 |                 | Amidase_2 | 99.9            | 3.2E-25        |              |                 |         |         | Myoviridae; I3-like viruses; unclassified I3-like viruses. |                               |                              |
|                | My191MpK          | Mycobacterium phage Pleione         | AEN79838.1                    | 476            |                 |                 | Amidase_2 | 99.9            | 8.3E-25        |              |                 |         |         | Myoviridae; I3-like viruses; unclassified I3-like viruses. |                               |                              |
|                | My192MpK          | Mycobacterium phage Rizal           | ACH62441.1                    | 476            |                 |                 | Amidase_2 | 99.9            | 3.2E-25        |              |                 |         |         | Myoviridae; I3-like viruses; unclassified I3-like viruses. |                               |                              |
|                | My193MpK          | Mycobacterium phage Sebata          | AEK06690.1                    | 476            |                 |                 | Amidase_2 | 99.9            | 2.1E-25        |              |                 |         |         | Myoviridae; I3-like viruses; unclassified I3-like viruses. |                               |                              |
|                | My194MpK          | Mycobacterium phage Wally           | AER25581.1                    | 476            |                 |                 | Amidase_2 | 99.9            | 3.2E-25        |              |                 |         |         | Myoviridae; I3-like viruses; unclassified I3-like viruses. |                               |                              |
|                | My195SpP55        | Mycobacteriophage PBI1              | ABD58451.1                    | 327            | Peptidase_M15_4 | 99.4            | 3.9E-13   | PG_binding_1    | 99.5           | 1.8E-14      | PG_binding_1    | 98.5    | 1.4E-07 |                                                            | Siphoviridae                  |                              |
|                | My196XpP55        | Mycobacterium phage SirHarley       | AEK10244.1                    | 327            | Peptidase_M15_4 | 99.2            | 8.6E-12   | PG_binding_1    | 99.5           | 4.2E-14      | PG_binding_1    | 98.5    | 8.0E-08 |                                                            | Viruses; unclassified phages  |                              |
|                | My197SpSD         | Mycobacteriophage 244               | ABD58009.1                    | 500            | NLPC_P60.       | 97.3            | 2.0E-04   | Glyco_hydro_25  | 100.0          | 5.5E-38      |                 |         |         |                                                            | Siphoviridae                  |                              |
|                | My198XpSD         | Mycobacterium phage Bask21          | AEK08331.1                    | 500            | NLPC_P60.       | 97.3            | 1.9E-04   | Glyco_hydro_25  | 100.0          | 3.4E-38      |                 |         |         |                                                            | Viruses; unclassified phages  |                              |
|                | My199SpSD         | Mycobacterium phage Elph10          | AEL21790.1                    | 500            | NLPC_P60.       | 97.5            | 7.2E-05   | Glyco_hydro_25  | 100.0          | 4.4E-38      |                 |         |         |                                                            | Siphoviridae                  |                              |
|                | My200SpSD         | Mycobacterium phage Eureka          | AEL98050.1                    | 500            | NLPC_P60.       | 97.5            | 7.0E-05   | Glyco_hydro_25  | 100.0          | 3.3E-38      |                 |         |         |                                                            | Siphoviridae                  |                              |
|                | My201XpSD         | Mycobacterium phage Henry           | AEK08884.1                    | 500            | NLPC_P60.       | 97.3            | 1.3E-04   | Glyco_hydro_25  | 100.0          | 4.9E-38      |                 |         |         |                                                            | Viruses; unclassified phages  |                              |
|                | My202SpSD         | Mycobacterium phage Lilac           | AEL21651.1                    | 500            | NLPC_P60.       | 97.5            | 7.2E-05   | Glyco_hydro_25  | 100.0          | 4.4E-38      |                 |         |         |                                                            | Siphoviridae                  |                              |
|                | My203SpSD         | Mycobacterium phage Porky           | ACF33849.1                    | 500            | NLPC_P60.       | 97.5            | 7.2E-05   | Glyco_hydro_25  | 100.0          | 4.5E-38      |                 |         |         |                                                            | Siphoviridae                  |                              |
|                | My204SpSD         | Mycobacterium phage Pumpkin         | ACU41968.1                    | 500            | NLPC_P60.       | 97.3            | 1.9E-04   | Glyco_hydro_25  | 100.0          | 3.4E-38      |                 |         |         |                                                            | Siphoviridae                  |                              |
|                | My205SpSD         | Mycobacterium phage Rakim           | AEJ92570.1                    | 500            | NLPC_P60.       | 97.5            | 7.2E-05   | Glyco_hydro_25  | 100.0          | 4.4E-38      |                 |         |         |                                                            | Siphoviridae                  |                              |
|                | My206XpSD         | Mycobacterium phage SirDuracell     | AEK10096.1                    | 500            | NLPC_P60.       | 97.3            | 1.3E-04   | Glyco_hydro_25  | 100.0          | 4.9E-38      |                 |         |         |                                                            | Viruses; unclassified phages  |                              |
|                | My207SpD          | Mycobacterium phage Toto            | AEJ92429.1                    | 477            |                 |                 |           | Glyco_hydro_25  | 100.0          | 1.6E-37      |                 |         |         |                                                            | Siphoviridae                  |                              |
|                | My208SpK          | Mycobacterium phage DeadP           | AER47775.1                    | 384            |                 |                 |           | Amidase_2       | 99.9           | 1.9E-23      |                 |         |         |                                                            | Siphoviridae                  |                              |
|                | My209XpK          | Mycobacterium phage Diane           | AEK08574.1                    | 384            |                 |                 |           | Amidase_2       | 99.9           | 3.0E-23      |                 |         |         |                                                            | Viruses; unclassified phages  |                              |
|                | My210SpK          | Mycobacterium phage Drago           | AEL98562.1                    | 397            |                 |                 |           | Amidase_2       | 99.9           | 2.4E-23      |                 |         |         |                                                            | Siphoviridae                  |                              |
|                | My211SpK          | Mycobacteriophage PMC               | ABE67531.1                    | 397            |                 |                 |           | Amidase_2       | 99.9           | 2.4E-23      |                 |         |         |                                                            | Siphoviridae                  |                              |
|                | My212XpK          | Mycobacterium phage Yoshi           | AEK07788.1                    | 415            |                 |                 |           | Amidase_2       | 99.9           | 4.1E-24      |                 |         |         |                                                            | Viruses; unclassified phages  |                              |
|                | My213SpQK5        | Mycobacterium phage Avrafan         | AER48482.1                    | 438            | Peptidase_M23   | 99.9            | 2.2E-25   | Amidase_2       | 99.9           | 4.6E-24      | PG_binding_1    | 99.3    | 1.2E-12 |                                                            | Siphoviridae                  |                              |
|                | My214SpQK5        | Mycobacterium phage Hope            | ACU41491.1                    | 438            | Peptidase_M23   | 99.9            | 2.2E-25   | Amidase_2       | 99.9           | 4.6E-24      | PG_binding_1    | 99.3    | 1.2E-12 |                                                            | Siphoviridae                  |                              |
|                | My215SpQK5        | Mycobacterium phage Liefie          | AEL98499.1                    | 438            | Peptidase_M23   | 99.9            | 2.2E-25   | Amidase_2       | 99.9           | 4.6E-24      | PG_binding_1    | 99.3    | 1.2E-12 |                                                            | Siphoviridae                  |                              |
|                | My216SpS5         | Mycobacterium phage Brujita         | ACI06243.1                    | 314            | NLPC_P60.       | 99.2            | 5.4E-12   | PG_binding_1    | 99.6           | 2.7E-15      |                 |         |         |                                                            | Siphoviridae                  |                              |
|                | My217SpS5         | Mycobacterium phage island3         | ADL71213.1                    | 314            | NLPC_P60.       | 99.2            | 5.4E-12   | PG_binding_1    | 99.6           | 2.7E-15      |                 |         |         |                                                            | Siphoviridae                  |                              |
|                | My218XpSD2        | Mycobacterium phage Pixie           | AEK09842.1                    | 561            | NLPC_P60.       | 97.2            | 2.4E-04   | Glyco_hydro_25  | 100.0          | 1.5E-39      | LysM            | 96.4    | 4.1E-04 |                                                            | Viruses; unclassified phages  |                              |
|                | My219SpSD         | Mycobacterium phage Fionnbharth     | AER26323.1                    | 536            | NLPC_P60.       | 97.2            | 1.8E-04   | Glyco_hydro_25  | 100.0          | 5.6E-38      |                 |         |         |                                                            | Siphoviridae                  |                              |
|                | My220SpSD         | Mycobacterium phage Larva           | AEL19685.1                    | 544            | NLPC_P60.       | 97.0            | 2.7E-04   | Glyco_hydro_25  | 100.0          | 7.1E-39      |                 |         |         |                                                            | Siphoviridae                  |                              |
|                | My221XpK          | Mycobacterium phage JoeDirt         | AEK07072.1                    | 390            |                 |                 |           | Amidase_2       | 99.9           | 8.3E-24      |                 |         |         |                                                            | Viruses; unclassified phages  |                              |
|                | My222SpS5         | Mycobacterium phage Dori            | AER47689.1                    | 311            | NLPC_P60.       | 99.8            | 2.9E-19   | PG_binding_1    | 99.6           | 3.4E-15      |                 |         |         |                                                            | Siphoviridae                  |                              |
|                | Nocardia          | No1SpK88                            | Nocardia phage NBR1           | YP_004957669.1 | 359             | Amidase_2       | 99.9      | 1.8E-25         | LGFP           | 99.7/99.7    | 1.6E-17/6.9E-17 |         |         |                                                            | Siphoviridae.                 |                              |
|                | Pediococcus       | Pe1SpD4                             | Pediococcus phage dP1         | YP_004934212.1 | 413             | Glyco_hydro_25  | 100.0     | 2.9E-42         |                |              | SH3_5           | 99.8    | 7.2E-19 |                                                            | Siphoviridae.                 |                              |
|                | Propionibacterium | Pr1SpK                              | Propionibacterium phage PA6   | YP_001285596.1 | 286             | Amidase_2       | 99.9      | 5.3E-27         |                |              |                 |         |         |                                                            | Siphoviridae.                 |                              |
|                |                   | Pr2SpK                              | Propionibacterium phage PAD20 | YP_004414771.1 | 287             | Amidase_2       | 99.9      | 7.5E-26         |                |              |                 |         |         |                                                            | Siphoviridae.                 |                              |
|                |                   | Pr3SpK                              | Propionibacterium phage PAS50 | YP_004414725.1 | 285             | Amidase_2       | 99.9      | 1.8E-26         |                |              |                 |         |         |                                                            | Siphoviridae.                 |                              |
|                | Rhodococcus       | Rh1SpP5                             | Rhodococcus phage RRH1        | YP_005087029.1 | 244             |                 |           | Peptidase_M15_4 | 99.6           | 4.5E-16      | PG_binding_1    | 99.5    | 2.0E-14 |                                                            | Siphoviridae.                 |                              |
|                |                   | Rh2XpK                              | Rhodococcus phage REQ2        | YP_005087066.1 | 236             | Amidase_2       | 99.9      | 1.6E-27         |                |              |                 |         |         |                                                            | Viruses; unclassified phages. |                              |
|                |                   | Rh3SpK88                            | Rhodococcus phage REQ1        | YP_005087335.1 | 362             | Amidase_2       | 99.9      | 1.9E-25         | LGFP           | 99.6         | 1.5E-15         | LGFP    | 99.7    | 1.8E-16                                                    | Siphoviridae.                 |                              |
|                |                   | Rh4SpK                              | Rhodococcus phage ReqiDocB7   | ADD80813.1     | 329             | Amidase_2       | 99.9      | 7.0E-27         |                |              |                 |         |         |                                                            | Siphoviridae.                 |                              |
|                |                   | Rh5SpK                              | Rhodococcus phage ReqiPepy6   | ADD80901.1     | 265             | Amidase_2       | 99.9      | 2.8E-27         |                |              |                 |         |         |                                                            | Siphoviridae.                 |                              |
|                |                   | Rh6SpK5                             | Rhodococcus phage ReqiPoco6   | ADD81010.1     | 265             | Amidase_2       | 99.9      | 1.8E-27         |                |              | PG_binding_1    | 99.4    | 3.7E-13 |                                                            | Siphoviridae.                 |                              |
|                |                   | Rh7SpQD                             | Rhodococcus phage ReqiPine5   | ADD81145.1     | 478             | Peptidase_M23   | 99.9      | 3.9E-23         | Glyco_hydro_25 | 100.0        | 5.8E-39         |         |         |                                                            |                               | Siphoviridae.                |
|                |                   | Rh8XpT                              | Rhodococcus phage REQ3        | YP_005087244.1 | 250             | Peptidase_C39_2 | 99.8      | 1.8E-17         |                |              |                 |         |         |                                                            |                               | Viruses; unclassified phages |
| Staphylococcus | St1MpA            | Staphylococcus phage SA1            | ACZ55568.1                    | 154            | Phage_lysozyme  | 100.0           | 1.5E-34   |                 |                |              |                 |         |         | Myoviridae                                                 |                               |                              |
|                | St2SpY            | Staphylococcus phage phi13          | NP_803402.1                   | 251            | CHAP            | 99.8            | 9.4E-22   |                 |                |              |                 |         |         | Siphoviridae                                               |                               |                              |
|                | St3XpYJ4          | Staphylococcus phage phi2958PVL     | YP_002268027.1                | 484            | CHAP            | 99.8            | 4.0E-19   | Amidase_3       | 100.0          | 3.4E-39      | SH3_5           | 99.5    | 1.5E-14 | Viruses; unclassified phages                               |                               |                              |
|                | St4SpYJ4          | Staphylococcus phage phiETA2        | YP_001004328.1                | 470            | CHAP            | 99.8            | 2.9E-19   | Amidase_3       | 100.0          | 4.7E-37      | SH3_5           | 98.7    | 1.6E-08 | Siphoviridae                                               |                               |                              |
|                | St5SpYJ4          | Staphylococcus phage phiETA3        | YP_001004396.1                | 470            | CHAP            | 99.8            | 2.4E-19   | Amidase_3       | 100.0          | 2.9E-37      | SH3_5           | 98.7    | 1.5E-08 | Siphoviridae                                               |                               |                              |
|                | St6SpYK4          | Staphylococcus phage phiMR11        | YP_001604156.1                | 481            | CHAP            | 99.8            | 7.2E-20   | Amidase_2       | 99.9           | 1.3E-23      | SH3_5           | 99.1    | 2.5E-11 | Siphoviridae                                               |                               |                              |
|                | St7SpYK4          | Staphylococcus phage phiMR25        | YP_001949866.1                | 481            | CHAP            | 99.8            | 6.5E-20   | Amidase_2       | 99.9           | 1.6E-23      | SH3_5           | 99.2    | 2.3E-11 | Siphoviridae                                               |                               |                              |
|                | St8SpYJ4          | Staphylococcus phage phiNM          | YP_874013.1                   | 484            | CHAP            | 99.7            | 2.2E-19   | Amidase_3       | 100.0          | 4.4E-39      | SH3_5           | 99.5    | 4.6E-15 | Siphoviridae                                               |                               |                              |
|                | St9SpY4           | Staphylococcus phage phiNM3         | YP_908849.1/YP_908851.1       | 372            | CHAP            | 99.8            | 9.4E-22   |                 |                |              | SH3_5           | 99.9    | 3.7E-23 | Siphoviridae                                               |                               |                              |
|                | St10SpYJ4         | Staphylococcus phage phiPVL108      | YP_918945.1                   | 484            | CHAP            | 99.8            | 3.1E-19   | Amidase_3       | 100.0          | 1.7E-38      | SH3_5           | 99.6    | 3.8E-15 | Siphoviridae                                               |                               |                              |
|                | St11XpYJ4         | Staphylococcus phage phiPVL-CN125   | YP_002939731.1                | 484            | CHAP            | 99.7            | 1.0E-18   | Amidase_3       | 100.0          | 9.5E-39      | SH3_5           | 99.5    | 1.2E-14 | unclassified dsDNA phages                                  |                               |                              |
|                | St12SpYJ4         | Staphylococcus phage phiSauS-IPLA35 | YP_002332423.1                | 484            | CHAP            | 99.8            | 6.9E-19   | Amidase_3       | 100.0          | 1.1E-38      | SH3_5           | 99.5    | 4.0E-14 | Siphoviridae                                               |                               |                              |
|                | St13SpYK4         | Staphylococcus phage phiSauS-IPLA88 | YP_002332536.1                | 486            | CHAP            | 99.8            | 1.3E-19   | Amidase_2       | 99.9           | 3.6E-23      | SH3_5           | 99.3    | 5.6E-12 | Siphoviridae                                               |                               |                              |
|                | St14SpYJ4         | Staphylococcus phage phiSLT         | NP_075522.1                   | 484            | CHAP            | 99.8            | 2.7E-19   | Amidase_3       | 100.0          | 1.0E-38      | SH3_5           | 99.5    | 1.5E-14 | Siphoviridae                                               |                               |                              |

|                |                                |                                    |                                |                |                 |                |           |           |                 |                 |                 |                 |                               |                                                               |                                                  |
|----------------|--------------------------------|------------------------------------|--------------------------------|----------------|-----------------|----------------|-----------|-----------|-----------------|-----------------|-----------------|-----------------|-------------------------------|---------------------------------------------------------------|--------------------------------------------------|
| Staphylococcus | St15SpYJ4                      | Staphylococcus phage PVL           | NP_058463.1                    | 484            | CHAP            | 99.8           | 2.7E-19   | Amidase_3 | 100.0           | 3.9E-39         | SH3_5           | 99.5            | 8.7E-15                       | Siphoviridae                                                  |                                                  |
|                | St16PpY4                       | Staphylococcus phage SAP-2         | YP_001491539.1                 | 249            | CHAP            | 99.8           | 1.4E-21   |           |                 |                 | SH3_5           | 99.9            | 3.7E-24                       | Podoviridae; Picovirinae; AHJD-like viruses                   |                                                  |
|                | St17SpY                        | Staphylococcus phage SAP-26        | YP_003857094.1                 | 251            | CHAP            | 99.8           | 9.4E-22   |           |                 |                 |                 |                 |                               | Siphoviridae                                                  |                                                  |
|                | St18XpYJ4                      | Staphylococcus phage tp310-1       | YP_001429893.1                 | 484            | CHAP            | 99.7           | 1.0E-18   | Amidase_3 | 100.0           | 9.5E-39         | SH3_5           | 99.5            | 1.2E-14                       | Viruses; unclassified phages                                  |                                                  |
|                | St19XpYJ4                      | Staphylococcus phage tp310-2       | YP_001429961.1                 | 484            | CHAP            | 99.8           | 1.7E-19   | Amidase_3 | 100.0           | 4.5E-39         | SH3_5           | 99.5            | 1.1E-14                       | Viruses; unclassified phages                                  |                                                  |
|                | St20XpY                        | Staphylococcus phage tp310-3       | YP_001430017.1                 | 251            | CHAP            | 99.8           | 9.4E-22   |           |                 |                 |                 |                 |                               | Viruses; unclassified phages                                  |                                                  |
|                | St21MpYK4                      | Staphylococcus phage Twort         | YP_238716.1                    | 467            | CHAP            | 99.8           | 9.0E-21   | Amidase_2 | 99.9            | 6.5E-24         | SH3_5           | 99.4            | 2.1E-13                       | Myoviridae; SPO1-like viruses; unclassified SPO1-like viruses |                                                  |
|                | St22SpYJ4                      | Staphylococcus phage phi11         | NP_803306.2                    | 481            | CHAP            | 99.8           | 4.6E-20   | Amidase_2 | 99.9            | 1.9E-23         | SH3_5           | 99.4            | 8.9E-14                       | Siphoviridae                                                  |                                                  |
|                | St23SpY                        | Staphylococcus phage 187           | YP_239517.1                    | 251            | CHAP            | 99.8           | 1.1E-20   |           |                 |                 |                 |                 |                               | Siphoviridae                                                  |                                                  |
|                | St24SpQK4                      | Staphylococcus phage 2638A         | YP_239818.1                    | 486            | Peptidase_M23   | 99.9           | 3.5E-24   | Amidase_2 | 99.9            | 7.9E-25         | SH3_5           | 99.7            | 1.3E-17                       | Siphoviridae                                                  |                                                  |
|                | St25SpYK4                      | Staphylococcus phage 37            | YP_240103.1                    | 481            | CHAP            | 99.8           | 1.0E-19   | Amidase_2 | 99.9            | 8.9E-24         | SH3_5           | 99.3            | 2.1E-12                       | Siphoviridae                                                  |                                                  |
|                | St26SpYJ4                      | Staphylococcus phage 3A            | YP_239959.1                    | 484            | CHAP            | 99.7           | 3.9E-18   | Amidase_3 | 100.0           | 4.0E-38         | SH3_5           | 99.5            | 5.7E-14                       | Siphoviridae                                                  |                                                  |
|                | St27SpY                        | Staphylococcus phage 42E           | YP_239884.1                    | 251            | CHAP            | 99.8           | 1.2E-21   |           |                 |                 |                 |                 |                               | Siphoviridae                                                  |                                                  |
|                | St28PpY4                       | Staphylococcus phage 44AHJD        | NP_817310.1                    | 250            | CHAP            | 99.9           | 7.6E-22   |           |                 |                 | SH3_5           | 99.9            | 2.4E-24                       | Podoviridae; Picovirinae; AHJD-like viruses                   |                                                  |
|                | St29SpYK4                      | Staphylococcus phage 29            | YP_240560.1                    | 481            | CHAP            | 99.8           | 8.4E-20   | Amidase_2 | 99.9            | 2.2E-23         | SH3_5           | 99.1            | 2.5E-11                       | Siphoviridae                                                  |                                                  |
|                | St30SpYK4                      | Staphylococcus phage 52A           | YP_240634.1                    | 481            | CHAP            | 99.8           | 1.9E-19   | Amidase_2 | 99.9            | 1.7E-23         | SH3_5           | 99.2            | 2.6E-11                       | Siphoviridae                                                  |                                                  |
|                | St31SpYK4                      | Staphylococcus phage 53            | YP_239676.1                    | 484            | CHAP            | 99.7           | 7.7E-17   | Amidase_3 | 100.0           | 4.9E-37         | SH3_5           | 99.7            | 1.4E-17                       | Siphoviridae                                                  |                                                  |
|                | St32SpYK4                      | Staphylococcus phage 69            | YP_239596.1                    | 481            | CHAP            | 99.8           | 1.1E-19   | Amidase_2 | 99.9            | 3.8E-23         | SH3_5           | 99.1            | 2.5E-11                       | Siphoviridae                                                  |                                                  |
|                | St33SpYJ4                      | Staphylococcus phage 71            | YP_240407.1                    | 470            | CHAP            | 99.8           | 3.4E-19   | Amidase_3 | 100.0           | 2.5E-35         | SH3_5           | 98.9            | 1.4E-09                       | Siphoviridae                                                  |                                                  |
|                | St34SpYJ4                      | Staphylococcus phage 85            | YP_239752.1/YP_239755.1        | 451            | CHAP            | 99.8           | 4.2E-20   | Amidase_2 | 99.4            | 1.3E-13         | SH3_5           | 99.6            | 4.7E-16                       | Siphoviridae                                                  |                                                  |
|                | St35SpYK4                      | Staphylococcus phage 88            | YP_240699.1                    | 481            | CHAP            | 99.8           | 6.9E-20   | Amidase_2 | 99.9            | 2.0E-23         | SH3_5           | 99.1            | 2.8E-11                       | Siphoviridae                                                  |                                                  |
|                | St36SpYK4                      | Staphylococcus phage 92            | YP_240773.1                    | 481            | CHAP            | 99.8           | 7.1E-20   | Amidase_2 | 99.9            | 2.4E-23         | SH3_5           | 99.1            | 3.0E-11                       | Siphoviridae                                                  |                                                  |
|                | St37SpYJ4                      | Staphylococcus phage 96            | YP_240259.1                    | 484            | CHAP            | 99.8           | 3.5E-19   | Amidase_3 | 100.0           | 1.1E-38         | SH3_5           | 99.5            | 4.7E-14                       | Siphoviridae                                                  |                                                  |
|                | St38SpYJ4                      | Staphylococcus phage X2            | YP_240847.1/YP_240849.1        | 423            | CHAP            | 99.8           | 9.3E-21   | Amidase_2 | 98.7            | 3.0E-08         | SH3_5           | 99.5            | 3.4E-15                       | Siphoviridae                                                  |                                                  |
|                | St39SpYK4                      | Staphylococcus phage 55            | YP_240484.1                    | 481            | CHAP            | 99.8           | 8.8E-20   | Amidase_2 | 99.9            | 2.2E-23         | SH3_5           | 99.2            | 1.8E-11                       | Siphoviridae                                                  |                                                  |
|                | St40SpY4                       | Staphylococcus phage 66            | YP_239469.1                    | 250            | CHAP            | 99.8           | 1.0E-21   |           |                 |                 | SH3_5           | 99.9            | 1.8E-24                       | Siphoviridae                                                  |                                                  |
|                | St41SpYJ4                      | Staphylococcus phage 77            | NP_958622.1                    | 484            | CHAP            | 99.7           | 2.2E-19   | Amidase_3 | 100.0           | 4.4E-39         | SH3_5           | 99.5            | 4.6E-15                       | Siphoviridae                                                  |                                                  |
|                | St42SPYJ4                      | Staphylococcus phage 80alpha       | YP_001285385.1                 | 484            | CHAP            | 99.7           | 6.0E-17   | Amidase_3 | 100.0           | 1.4E-37         | SH3_5           | 99.7            | 1.4E-17                       | Siphoviridae                                                  |                                                  |
|                | St43SpYJ4                      | Staphylococcus phage CNPH82        | YP_950628.1                    | 460            | CHAP            | 99.7           | 2.1E-18   | Amidase_3 | 100.0           | 7.2E-40         | SH3_5           | 97.1            | 3.7E-04                       | Siphoviridae                                                  |                                                  |
|                | St44MpYK                       | Staphylococcus phage K             | YP_950628.1                    | 460            | CHAP            | 99.8           | 2.0E-19   | Amidase_2 | 99.9            | 1.5E-23         |                 |                 |                               | Myoviridae; SPO1-like viruses; unclassified SPO1-like viruses |                                                  |
|                | St45XpY                        | Staphylococcus phage P954          | YP_003169697.1                 | 251            | CHAP            | 99.8           | 9.4E-22   |           |                 |                 |                 |                 |                               | unclassified dsDNA phages                                     |                                                  |
|                | St46SpYK4                      | Staphylococcus phage PH15          | YP_950690.1                    | 460            | CHAP            | 99.7           | 2.8E-18   | Amidase_3 | 100.0           | 2.5E-39         | SH3_5           | 97.2            | 3.4E-04                       | Siphoviridae                                                  |                                                  |
|                | St47SpYJ4                      | Staphylococcus phage phi 12        | NP_803355.1                    | 484            | CHAP            | 99.8           | 7.2E-19   | Amidase_3 | 100.0           | 8.8E-39         | SH3_5           | 99.5            | 3.6E-14                       | Siphoviridae                                                  |                                                  |
|                | St48SpYK4                      | Staphylococcus phage EW            | YP_240182.1                    | 482            | CHAP            | 99.8           | 7.9E-20   | Amidase_2 | 99.9            | 8.3E-24         | SH3_5           | 99.3            | 2.7E-12                       | Siphoviridae                                                  |                                                  |
|                | St49SpYJ4                      | Staphylococcus phage TEM126        | ADV76514.1                     | 484            | CHAP            | 99.8           | 3.5E-19   | Amidase_3 | 100.0           | 3.5E-38         | SH3_5           | 99.6            | 3.1E-16                       | Siphoviridae                                                  |                                                  |
|                | St50PpY4                       | Staphylococcus phage S13'          | BAL42323.1                     | 253            | CHAP            | 99.9           | 2.3E-22   |           |                 |                 | SH3_5           | 99.9            | 3.6E-24                       | Podoviridae; Picovirinae; AHJD-like viruses.                  |                                                  |
|                | St51SpY                        | Staphylococcus prophage phiPV83    | NP_061648.1                    | 251            | CHAP            | 99.8           | 8.5E-22   |           |                 |                 |                 |                 |                               | Siphoviridae                                                  |                                                  |
|                | St52SpYJ4                      | Staphylococcus phage phiETA        | NP_510959.1                    | 470            | CHAP            | 99.8           | 2.8E-19   | Amidase_3 | 100.0           | 1.7E-37         | SH3_5           | 98.7            | 1.7E-08                       | Siphoviridae                                                  |                                                  |
|                | St53PpY4                       | Staphylococcus phage S24-1         | YP_004957430.1                 | 250            | CHAP            | 99.8           | 1.1E-21   |           |                 |                 | SH3_5           | 99.9            | 2.7E-24                       | Podoviridae; Picovirinae; AHJD-like viruses.                  |                                                  |
|                | St54MpYK4                      | Staphylococcus phage G1            | AAX92124.1/AAX92142.1          | 477            | CHAP            | 99.8           | 2.7E-19   | Amidase_2 | 99.7            | 2.9E-17         | SH3_5           | 99.6            | 2.1E-15                       | Myoviridae; Spounavirinae; Twortlikevirus.                    |                                                  |
|                | Streptococcus                  | Sc1SpS                             | Streptococcus phage 2972       | YP_238509.1    | 199             | Amidase_5      | 99.9      | 8.8E-26   |                 |                 |                 |                 |                               |                                                               | Siphoviridae                                     |
|                |                                | Sc2SpS                             | Streptococcus phage 5093       | YP_002925118.1 | 281             | Amidase_5      | 100.0     | 1.7E-29   |                 |                 |                 |                 |                               |                                                               | Siphoviridae                                     |
|                |                                | Sc3SpS                             | Streptococcus phage 7201       | NP_038345.1    | 281             | Amidase_5      | 100.0     | 7.2E-29   |                 |                 |                 |                 |                               |                                                               | Siphoviridae                                     |
|                |                                | Sc4SpS                             | Streptococcus phage 858        | YP_001686822.1 | 200             | Amidase_5      | 99.9      | 3.0E-26   |                 |                 |                 |                 |                               |                                                               | Siphoviridae                                     |
|                |                                | Sc5SpS                             | Streptococcus phage Abc2       | YP_003347431.1 | 281             | Amidase_5      | 100.0     | 1.9E-29   |                 |                 |                 |                 |                               |                                                               | Siphoviridae                                     |
|                |                                | Sc6SpS                             | Streptococcus phage ALQ13.2    | YP_003344870.1 | 200             | Amidase_5      | 99.9      | 1.1E-26   |                 |                 |                 |                 |                               |                                                               | Siphoviridae                                     |
|                |                                | Sc7PpY                             | Streptococcus phage C1 (PLYCA) | NP_852017.2    | 465             |                |           |           |                 |                 |                 | CHAP            | 98.7                          | 9.7E-09                                                       | Podoviridae; Picovirinae; AHJD-like viruses      |
|                |                                | Sc8PpD90                           | Streptococcus phage Cp-1       | NP_044837.1    | 339             | Glyco_hydro_25 | 100.0     | 2.4E-40   |                 |                 |                 | FOG             | 100.0                         | 9.2E-32                                                       | Podoviridae; picovirinae; unassigned picovirinae |
|                |                                | Sc9SpS90                           | Streptococcus phage Dp-1       | YP_004306947.1 | 296             | Amidase_5      | 99.9      | 8.8E-27   |                 |                 |                 | FOG             | 100.0                         | 3.4E-30                                                       | Siphoviridae                                     |
|                |                                | Sc10SpS                            | Streptococcus phage DT1        | NP_049413.1    | 200             | Amidase_5      | 100.0     | 1.7E-27   |                 |                 |                 |                 |                               |                                                               | Siphoviridae                                     |
|                |                                | Sc11MpK90                          | Streptococcus phage EJ-1       | NP_945312.1    | 316             | Amidase_2      | 99.9      | 6.6E-23   |                 |                 |                 | FOG             | 100.0                         | 6.3E-31                                                       | Myoviridae                                       |
|                |                                | Sc12SpD                            | Streptococcus phage M102       | YP_002995476.1 | 273             | Glyco_hydro_25 | 100.0     | 3.6E-44   |                 |                 |                 |                 |                               |                                                               | Siphoviridae                                     |
| Sc13SpY        |                                | Streptococcus phage M102 (another) | YP_002995477.1                 | 171            | CHAP            | 99.8           | 4.9E-21   |           |                 |                 |                 |                 |                               | Siphoviridae                                                  |                                                  |
| Sc14SpK90      |                                | Streptococcus phage MM1            | NP_150182.1                    | 318            | Amidase_2       | 99.9           | 2.0E-22   |           |                 |                 | FOG             | 100.0           | 1.3E-30                       | Siphoviridae                                                  |                                                  |
| Sc15SpS        |                                | Streptococcus phage O1205          | NP_695129.1                    | 281            | Amidase_5       | 99.9           | 1.1E-25   |           |                 |                 |                 |                 |                               | Siphoviridae                                                  |                                                  |
| Sc16SpHY4      |                                | Streptococcus phage P9             | YP_001469230.1                 | 400            | Glucosaminidase | 100.0          | 1.4E-31   | CHAP      | 99.8            | 2.5E-19         | SH3_5           | 99.9            | 3.1E-22                       | Siphoviridae                                                  |                                                  |
| Sc17SpD90      |                                | Streptococcus phage PH10           | YP_002925184.1                 | 334            | Glyco_hydro_25  | 100.0          | 8.1E-42   |           |                 |                 | FOG             | 100.0           | 5.8E-33                       | Siphoviridae                                                  |                                                  |
| Sc18SpS        |                                | Streptococcus phage PH15           | YP_001974380.1                 | 283            | Amidase_5       | 99.9           | 3.8E-27   |           |                 |                 |                 |                 |                               | Siphoviridae                                                  |                                                  |
| Sc19SpY4       |                                | Streptococcus phage phi3396        | YP_001039943.1                 | 258            | CHAP            | 99.8           | 2.3E-19   |           |                 |                 | SH3_5           | 99.9            | 6.1E-25                       | Siphoviridae                                                  |                                                  |
| Sc20SpS        |                                | Streptococcus phage Sfi11          | NP_056699.1                    | 288            | Amidase_5       | 100.0          | 8.0E-29   |           |                 |                 |                 |                 |                               | Siphoviridae                                                  |                                                  |
| Sc21SpS        |                                | Streptococcus phage Sfi19          | NP_049942.1                    | 288            | Amidase_5       | 100.0          | 6.7E-31   |           |                 |                 |                 |                 |                               | Siphoviridae                                                  |                                                  |
| Sc22SpS        |                                | Streptococcus phage Sfi21          | NP_049985.1                    | 288            | Amidase_5       | 100.0          | 8.0E-29   |           |                 |                 |                 |                 |                               | Siphoviridae                                                  |                                                  |
| Sc23SpS90      |                                | Streptococcus phage SM1            | NP_862895.1                    | 295            | Amidase_5       | 99.9           | 5.0E-27   |           |                 |                 | FOG             | 100.0           | 1.6E-30                       | Siphoviridae                                                  |                                                  |
| Sc24SpSH77     |                                | Streptococcus phage SMP            | YP_950557.1                    | 481            | Amidase_5       | 99.9           | 2.7E-26   | Cpl-7     | 99.5/99.9       | 2.4E-14/2.5E-09 | Glucosaminidase | 100.0           | 1.8E-29                       | Siphoviridae                                                  |                                                  |
| Sc25XpY4       |                                | Streptococcus phage YMC-2011       | AEJ54375.1                     | 248            | CHAP            | 99.8           | 3.1E-21   |           |                 |                 | SH3_5           | 99.9            | 1.8E-24                       | Viruses; unclassified phages                                  |                                                  |
| Sc26XpHY4      |                                | Streptococcus pyogenes phage 315.1 | NP_795423.1                    | 402            | Glucosaminidase | 100.0          | 8.5E-30   | CHAP      | 99.6            | 2.4E-15         | SH3_5           | 99.9            | 3.7E-22                       | Viruses; unclassified phages                                  |                                                  |
| Sc27XpHY4      |                                | Streptococcus pyogenes phage 315.2 | NP_795485.1                    | 402            | Glucosaminidase | 100.0          | 1.1E-29   | CHAP      | 99.6            | 4.1E-15         | SH3_5           | 99.9            | 4.5E-22                       | Viruses; unclassified phages                                  |                                                  |
| Sc28XpSH7      |                                | Streptococcus pyogenes phage 315.3 | NP_795538.1                    | 404            | Amidase_5       | 100.0          | 3.5E-30   | Cpl-7     | 99.2            | 7.2E-12         | Glucosaminidase | 100.0           | 1.9E-30                       | Viruses; unclassified phages                                  |                                                  |
| Sc29XpHY4      |                                | Streptococcus pyogenes phage 315.4 | NP_795599.1                    | 400            | Glucosaminidase | 100.0          | 1.9E-29   | CHAP      | 99.6            | 8.4E-16         | SH3_5           | 99.9            | 2.2E-22                       | Viruses; unclassified phages                                  |                                                  |
| Sc30XpY4       |                                | Streptococcus pyogenes phage 315.5 | NP_795653.1                    | 254            | CHAP            | 99.7           | 2.9E-18   |           |                 |                 | SH3_5           | 99.9            | 4.3E-24                       | Viruses; unclassified phages                                  |                                                  |
| Sc31XpH        |                                | Streptococcus pyogenes phage 315.6 | NP_795706.1/NP_795707.1        | 307            | Glucosaminidase | 99.8           | 4.2E-21   | CHAP      | 99.7            | 9.1E-18         | SH3_5           | 99.9            | 3.3E-23                       | Viruses; unclassified phages                                  |                                                  |
| Sc32SpHY4      |                                | Temperate phage phiNIH1.1          | NP_438163.1                    | 400            | Glucosaminidase | 100.0          | 1.9E-29   | CHAP      | 99.6            | 8.4E-16         | SH3_5           | 99.9            | 2.2E-22                       | Siphoviridae                                                  |                                                  |
| Sc33XpY        |                                | Streptococcus phage phi-m46.1      | CAR95425.1                     | 121            | CHAP            | 99.7           | 3.3E-18   |           |                 |                 |                 |                 |                               | Viruses; unclassified phages.                                 |                                                  |
| Sc34XpJS22     | Streptococcus phage phi-SsUD.1 | CBR26921.1                         | 489                            | Amidase_3      | 100.0           | 7.1E-36        | LysM      | 98.5/99.0 | 7.4E-08/2.4E-10 | NLPC_P60        | 99.7            | 7.7E-19         | Viruses; unclassified phages. |                                                               |                                                  |
| Sc35XpK90      | Streptococcus phage 23782      | CBW39083.1                         | 318                            | Amidase_2      | 99.9            | 1.0E-22        |           |           |                 | FOG             | 100.0           | 2.6E-30         | Viruses; unclassified phages. |                                                               |                                                  |
| Tsukamurella   | Ts1SpK88                       | Tsukamurella phage TPA2            | YP_004286296.1                 | 535            |                 |                | Amidase_2 | 99.9      | 1.4E-23         | LGFP            | 99.6/99.6       | 1.6E-15/2.2E-16 | Siphoviridae                  |                                                               |                                                  |

| Gram Negative Host | CODE    | Phage name                              | protein ID     | Size (aa) | SAR | N-terminal      | Prob  | E-Value | Middle | Prob | E-Value | C-terminal   | Prob | E-value | Phage classification                                                 |
|--------------------|---------|-----------------------------------------|----------------|-----------|-----|-----------------|-------|---------|--------|------|---------|--------------|------|---------|----------------------------------------------------------------------|
| Acinetobacter      | Ac1MnJ  | Acinetobacter phage Ac42                | YP_004009379.1 | 177       |     | Amidase_3       | 100.0 | 3.3E-48 |        |      |         |              |      |         | Myoviridae; T4-like viruses                                          |
|                    | Ac2MnA  | Acinetobacter phage Acj61               | YP_004009630.1 | 190       |     | Phage_lysozyme  | 100.0 | 1.4E-32 |        |      |         |              |      |         | Myoviridae; T4-like viruses                                          |
|                    | Ac3MnJ  | Acinetobacter phage Acj9                | YP_004010153.1 | 172       |     | Amidase_3       | 100.0 | 6.0E-48 |        |      |         |              |      |         | Myoviridae; T4-like viruses                                          |
| Aeromonas          | Ae1MnA  | Aeromonas phage PX29                    | ADQ53036.1     | 165       |     | Phage_lysozyme  | 100.0 | 3.9E-29 |        |      |         |              |      |         | Myoviridae; T4-like viruses                                          |
|                    | Ae2MnB  | Aeromonas phage PAS-1                   | AEM36042.1     | 153       |     | Muramidase      | 100.0 | 1.5E-51 |        |      |         |              |      |         | Myoviridae                                                           |
|                    | Ae3PnA  | Aeromonas phage phiAS7                  | AEZ65050.1     | 112       |     | Phage_lysozyme  | 100.0 | 4.8E-31 |        |      |         |              |      |         | Podoviridae; Autographivirinae; unassigned Autographivirinae         |
|                    | Ae4MnA  | Aeromonas phage phiAS4                  | YP_003969055.1 | 164       |     | Phage_lysozyme  | 99.9  | 6.3E-28 |        |      |         |              |      |         | Myoviridae; T4-like viruses                                          |
|                    | Ae5MnA  | Aeromonas phage 44RR.2t                 | NP_932578.1    | 164       |     | Phage_lysozyme  | 99.9  | 1.9E-28 |        |      |         |              |      |         | Myoviridae; T4-like viruses                                          |
|                    | Ae6MnA  | Aeromonas phage 25                      | YP_656449.1    | 164       |     | Phage_lysozyme  | 100.0 | 1.4E-29 |        |      |         |              |      |         | Myoviridae; T4-like viruses; unclassified T4-like viruses            |
|                    | Ae7MnA  | Aeromonas phage 31                      | YP_238949.1    | 164       |     | Phage_lysozyme  | 99.9  | 1.8E-28 |        |      |         |              |      |         | Myoviridae; T4-like viruses; unclassified T4-like viruses            |
|                    | Ae8MnA  | Aeromonas phage Aeh1                    | NP_944217.1    | 165       |     | Phage_lysozyme  | 100.0 | 9.8E-29 |        |      |         |              |      |         | Myoviridae; T4-like viruses                                          |
|                    | Ae9MnB  | Aeromonas phage phiO18P                 | YP_001285657.1 | 153       |     | Muramidase      | 100.0 | 7.9E-52 |        |      |         |              |      |         | Myoviridae; P2-like viruses                                          |
|                    | Ae10MnA | Aeromonas phage 65                      | YP_004300997.1 | 166       |     | Phage_lysozyme  | 99.9  | 1.7E-28 |        |      |         |              |      |         | Myoviridae; T4-like viruses                                          |
|                    | Ae11MnA | Aeromonas phage phiAS5                  | YP_003969406.1 | 165       |     | Phage_lysozyme  | 99.9  | 7.8E-28 |        |      |         |              |      |         | Myoviridae; T4-like viruses                                          |
| Azospirillum       | Az1SnA  | Azospirillum phage Cd                   | YP_001686894.1 | 148       |     | Phage_lysozyme  | 100.0 | 5.2E-34 |        |      |         |              |      |         | Siphoviridae                                                         |
| Aggregatibacter    | Ag1MnC  | Aggregatibacter phage S1249             | YP_003344813.1 | 193       |     | Glyco_hydro_19  | 100.0 | 2.1E-40 |        |      |         |              |      |         | Myoviridae; unclassified Myoviridae                                  |
| Bacteroides        | Ba1SnO  | Bacteroides phage B40-8                 | YP_002221548.1 | 132       |     | Peptidase_M15_3 | 100.0 | 1.1E-38 |        |      |         |              |      |         | Siphoviridae; unclassified Siphoviridae                              |
|                    | Ba2XnO  | Bacteroides phage B124-14               | YP_005102482.1 | 131       |     | Peptidase_M15_3 | 100.0 | 4.3E-39 |        |      |         |              |      |         | Viruses; unclassified phages                                         |
| Burkholderia       | Bu1MnC  | Burkholderia phage BcepF1               | YP_001039778.1 | 218       |     | Glyco_hydro_19  | 100.0 | 3.5E-42 |        |      |         |              |      |         | Myoviridae; unclassified Myoviridae; Bcep781 - like phages           |
|                    | Bu2MnA  | Burkholderia phage BcepB1A              | YP_024909.1    | 165       |     | Phage_lysozyme  | 100.0 | 3.6E-33 |        |      |         |              |      |         | Myoviridae; unclassified Myoviridae                                  |
|                    | Bu3PnA  | Burkholderia phage Bcep22               | YP_001531197.1 | 174       | SAR | Phage_lysozyme  | 100.0 | 6.6E-33 |        |      |         |              |      |         | Podoviridae; unclassified Podoviridae                                |
|                    | Bu4SnB  | Burkholderia phage BcepNazgul           | NP_918971.2    | 177       |     | Muramidase      | 100.0 | 1.0E-48 |        |      |         |              |      |         | Siphoviridae; unclassified Siphoviridae                              |
|                    | Bu5MnF  | Burkholderia phage phiE255              | YP_001111252.1 | 203       |     | SLT             | 99.9  | 3.2E-25 |        |      |         |              |      |         | Myoviridae; unclassified Myoviridae                                  |
|                    | Bu6SnO  | Burkholderia phage KS9                  | YP_003090199.1 | 149       |     | Peptidase_M15_3 | 100.0 | 2.0E-37 |        |      |         |              |      |         | Siphoviridae; Lambda-like viruses; unclassified Lambda-like viruses  |
|                    | Bu7SnA  | Burkholderia phage phi1026b             | NP_945054.1    | 163       |     | Phage_lysozyme  | 100.0 | 1.1E-33 |        |      |         |              |      |         | Siphoviridae; Lambda-like viruses; unclassified Lambda-like viruses  |
|                    | Bu8SnA  | Burkholderia phage phiE125              | NP_536381.1    | 134       |     | Phage_lysozyme  | 100.0 | 7.9E-36 |        |      |         |              |      |         | Siphoviridae; Lambda-like viruses; unclassified Lambda-like viruses  |
|                    | Bu9PnB  | Burkholderia phage BcepC6B              | YP_024942.1    | 164       |     | Muramidase      | 100.0 | 1.9E-48 |        |      |         |              |      |         | Podoviridae; Bpp-1-like viruses                                      |
|                    | Bu10SnA | Burkholderia phage Bcep176              | YP_355393.1    | 165       |     | Phage_lysozyme  | 100.0 | 3.1E-34 |        |      |         |              |      |         | Siphoviridae                                                         |
|                    | Bu11PnA | Burkholderia phage BcepIL02             | YP_002922746.1 | 174       |     | Phage_lysozyme  | 100.0 | 3.5E-33 |        |      |         |              |      |         | Podoviridae                                                          |
|                    | Bu12MnF | Burkholderia phage BcepMu               | YP_024695.1    | 203       |     | SLT             | 99.9  | 1.0E-25 |        |      |         |              |      |         | Myoviridae; Mu-like viruses                                          |
|                    | Bu13MnF | Burkholderia phage KS10                 | YP_002221425.1 | 223       |     | SLT             | 99.9  | 1.8E-24 |        |      |         |              |      |         | Myoviridae                                                           |
|                    | Bu14SnA | Burkholderia phage phi644-2             | YP_001111104.1 | 171       |     | Phage_lysozyme  | 100.0 | 1.8E-32 |        |      |         |              |      |         | Siphoviridae; Lambda-like viruses; unclassified Lambda-like viruses  |
| Brucella           | Br1XnE1 | Brucella phage Tb                       | AEY69699.1     | 271       |     | Glyco_hydro_108 | 100.0 | 4.9E-35 |        |      |         | PG_binding_3 | 99.9 | 7.0E-23 | Viruses; unclassified phages                                         |
| Campylobacter      | Ca1MnF  | Campylobacter phage CP220               | CBJ93929.1     | 224       |     | SLT             | 98.0  | 1.1E-05 |        |      |         |              |      |         | Myoviridae                                                           |
|                    | Ca2MnF  | Campylobacter phage CPT10               | CBJ94327.1     | 224       |     | SLT             | 98.0  | 1.1E-05 |        |      |         |              |      |         | Myoviridae                                                           |
| Candidatus         | Cn1PnA  | Acyrtosiphon pisum bacteriophage APSE-1 | NP_050974.1    | 146       |     | Phage_lysozyme  | 100.0 | 5.9E-36 |        |      |         |              |      |         | Podoviridae                                                          |
|                    | Cn2PnA  | Bacteriophage APSE-2                    | ACJ10174.1     | 155       |     | Phage_lysozyme  | 100.0 | 7.6E-36 |        |      |         |              |      |         | Podoviridae; unclassified Podoviridae                                |
|                    | Cn3XnA  | Bacteriophage APSE-4                    | J10096.1       | 146       |     | Phage_lysozyme  | 100.0 | 8.9E-35 |        |      |         |              |      |         | Viruses; unclassified phages                                         |
|                    | Cn4XnA  | Bacteriophage APSE-7                    | ACJ10111.1     | 146       |     | Phage_lysozyme  | 100.0 | 4.3E-35 |        |      |         |              |      |         | Viruses; unclassified phages                                         |
|                    | Cn5XnA  | Bacteriophage APSE-5                    | ACJ10082.1     | 146       |     | Phage_lysozyme  | 100.0 | 1.1E-34 |        |      |         |              |      |         | Viruses; unclassified phages                                         |
|                    | Cn6XnA  | Bacteriophage APSE-3                    | ACJ10123.1     | 157       |     | Phage_lysozyme  | 100.0 | 1.9E-35 |        |      |         |              |      |         | Viruses; unclassified phages                                         |
|                    | Cn7XnA  | Bacteriophage APSE-6                    | ACJ10136.1     | 157       |     | Phage_lysozyme  | 100.0 | 8.8E-36 |        |      |         |              |      |         | Viruses; unclassified phages                                         |
| Caulobacter        | Cu1PnA  | Caulobacter phage Cd1                   | ADD21680.1     | 185       | SAR | Phage_lysozyme  | 100.0 | 1.8E-33 |        |      |         |              |      |         | Podoviridae; Autographivirinae; unclassified phiKMV-like phages      |
| Clavibacter        | Cl1XnM  | Clavibacter phage CN77                  | ACY27520.1     | 290       |     | VanY            | 100.0 | 3.4E-33 |        |      |         |              |      |         | Viruses; unclassified phages                                         |
| Cronobacter        | Cr1XnC  | Cronobacter phage ENT47670              | ADZ13641.1     | 204       |     | Glyco_hydro_19  | 100.0 | 1.0E-39 |        |      |         |              |      |         | Viruses; unclassified phages                                         |
|                    | Cr2SnA  | Cronobacter phage ESP2949-1             | AEM24793.1     | 169       |     | Phage_lysozyme  | 100.0 | 1.6E-33 |        |      |         |              |      |         | Siphoviridae; T1-like viruses; unclassified T1-like viruses          |
|                    | Cr3XnA  | Cronobacter phage ES2                   | AEM24706.1     | 164       | SAR | Phage_lysozyme  | 100.0 | 7.9E-35 |        |      |         |              |      |         | Viruses; unclassified phages                                         |
|                    | Cr4XnC  | Cronobacter phage ENT39118              | ADZ13601.1     | 207       |     | Glyco_hydro_19  | 100.0 | 1.4E-40 |        |      |         |              |      |         | Viruses; unclassified phages.                                        |
| Delftia            | De1MnC  | Delftia phage phiW-14                   | YP_003358866.1 | 196       |     | Glyco_hydro_19  | 100.0 | 3.9E-40 |        |      |         |              |      |         | Myoviridae; unclassified Myoviridae                                  |
| Enterobacter       | En1SnA  | Enterobacteria phage F20                | AEQ39188.1     | 159       |     | Phage_lysozyme  | 100.0 | 2.1E-35 |        |      |         |              |      |         | Siphoviridae                                                         |
| Escherichia        | Es1PnC  | Escherichia phage TL-2011b              | AEW24559.1     | 209       |     | Glyco_hydro_19  | 100.0 | 1.5E-42 |        |      |         |              |      |         | Podoviridae                                                          |
|                    | Es2MnB  | Escherichia phage vB_EcoM_ECO1230-10    | ADE87938.1     | 162       |     | Muramidase      | 100.0 | 5.2E-52 |        |      |         |              |      |         | Myoviridae                                                           |
|                    | Es3SnC  | Escherichia phage HK639                 | YP_004934099.1 | 209       |     | Glyco_hydro_19  | 100.0 | 2.9E-40 |        |      |         |              |      |         | Siphoviridae; Lambda-like viruses; unclassified Lambda-like viruses. |
|                    | Es4PnC  | Escherichia phage phiV10                | YP_512283.1    | 209       |     | Glyco_hydro_19  | 100.0 | 4.1E-41 |        |      |         |              |      |         | Podoviridae.                                                         |
|                    | Es5MnB  | Escherichia phage rv5                   | YP_002003587.1 | 156       |     | Muramidase      | 100.0 | 7.4E-52 |        |      |         |              |      |         | Myoviridae.                                                          |
|                    | Es6PnE1 | Escherichia phage vB_EcoP_G7C           | YP_004782192.1 | 211       | SAR | Glyco_hydro_108 | 100.0 | 2.7E-36 |        |      |         | PG_binding_3 | 99.9 | 1.2E-21 | Podoviridae; N4-like viruses; unclassified N4-like viruses.          |
|                    | Es7SnA  | Escherichia phage K1H                   | ADA82342.1     | 162       |     | Phage_lysozyme  | 100.0 | 8.2E-35 |        |      |         |              |      |         | Siphoviridae;                                                        |
|                    | Es8SnA  | Escherichia phage K1ind3                | ADA82488.1     | 161       |     | Phage_lysozyme  | 100.0 | 9.9E-35 |        |      |         |              |      |         | Siphoviridae;                                                        |
|                    | Es9SnA  | Escherichia phage K1G                   | ADA82292.1     | 161       |     | Phage_lysozyme  | 100.0 | 8.5E-35 |        |      |         |              |      |         | Siphoviridae;                                                        |
|                    | Es10MnA | Escherichia phage wV7                   | AEM00790.1     | 164       |     | Phage_lysozyme  | 99.9  | 2.2E-27 |        |      |         |              |      |         | Myoviridae; T4-like viruses.                                         |
|                    | Es11SnB | Escherichia phage HK75                  | YP_004934160.1 | 158       |     | Muramidase      | 100.0 | 7.8E-52 |        |      |         |              |      |         | Siphoviridae; Lambda-like viruses; unclassified Lambda-like viruses  |
|                    | Es12SnA | Stx2-converting phage 1717              | YP_002274257.1 | 165       | SAR | Phage_lysozyme  | 100.0 | 4.7E-35 |        |      |         |              |      |         | Siphoviridae; Lambda-like viruses; unclassified Lambda-like viruses. |
|                    | Es13SnA | Stx2-converting phage 86                | YP_794054.1    | 177       | SAR | Phage_lysozyme  | 100.0 | 1.4E-32 |        |      |         |              |      |         | Siphoviridae; Lambda-like viruses; unclassified Lambda-like viruses. |
|                    | Es14SnA | Stx2 converting phage II                | YP_003828995.1 | 177       | SAR | Phage_lysozyme  | 100.0 | 6.5E-33 |        |      |         |              |      |         | Siphoviridae; Lambda-like viruses; unclassified Lambda-like viruses. |
|                    | Es15XnA | Escherichia phage phiEB49               | AEI91208.1     | 160       |     | Phage_lysozyme  | 100.0 | 7.4E-35 |        |      |         |              |      |         | Viruses; unclassified phages                                         |
|                    | Es16SnA | Enterobacteria phage T1                 | YP_003933.1    | 162       |     | Phage_lysozyme  | 100.0 | 1.5E-34 |        |      |         |              |      |         | Siphoviridae; T1-like viruses                                        |
|                    | Es17PnK | Enterobacteria phage T3                 | NP_523313.1    | 151       |     | Amidase_2       | 100.0 | 1.3E-30 |        |      |         |              |      |         | Podoviridae; Autographivirinae; T7-like viruses.                     |
|                    | Es18MnA | Enterobacteria phage T4                 | NP_049736.1    | 164       |     | Phage_lysozyme  | 100.0 | 1.8E-28 |        |      |         |              |      |         | Myoviridae; T4-like viruses                                          |
|                    | Es19SnM | Enterobacteria phage T5                 | YP_006868.1    | 137       |     | VanY            | 99.7  | 8.6E-18 |        |      |         |              |      |         | Siphoviridae; T5-like viruses                                        |
|                    | Es20SnA | Enterobacteria phage TLS                | YP_001285558.1 | 164       |     | Phage_lysozyme  | 100.0 | 2.3E-34 |        |      |         |              |      |         | Siphoviridae; T1-like viruses; unclassified T1-like viruses.         |

|             |                |                                        |                           |                |                     |                    |         |                 |      |                                                                                    |                                                            |
|-------------|----------------|----------------------------------------|---------------------------|----------------|---------------------|--------------------|---------|-----------------|------|------------------------------------------------------------------------------------|------------------------------------------------------------|
| Escherichia | Es21MnA        | Enterobacteria phage vB_EcoM-VR7       | YP_004063811.1            | 162            | Phage_lysozyme      | 99.9               | 4.3E-28 |                 |      | Myoviridae; T4-like viruses.                                                       |                                                            |
|             | Es22MnA        | Enterobacteria phage WV8               | YP_002922821.1            | 154            | Phage_lysozyme      | 100.0              | 4.2E-34 |                 |      | Myoviridae.                                                                        |                                                            |
|             | Es23PnA        | Enterobacteria phage Min27             | ABY49900.1                | 177            | SAR Phage_lysozyme  | 100.0              | 6.5E-33 |                 |      | Podoviridae; unclassified Podoviridae                                              |                                                            |
|             | Es24SnB        | Enterobacteria phage lambda            | NP_040645.1               | 158            | Muramidase          | 100.0              | 6.2E-52 |                 |      | Siphoviridae; Lambda-like viruses                                                  |                                                            |
|             | Es25PnK        | Enterobacteria phage K1F               | YP_338105.1               | 152            | Amidase_2           | 100.0              | 7.1E-31 |                 |      | Podoviridae; Autographivirinae; T7-like viruses                                    |                                                            |
|             | Es26PnB        | Enterobacteria phage IME10             | AER08021.1                | 158            | Muramidase          | 100.0              | 4.6E-52 |                 |      | Podoviridae                                                                        |                                                            |
|             | Es27MnB        | Enterobacteria phage vB_EcoM-FV3       | AEZ65218.1                | 162            | Muramidase          | 100.0              | 4.0E-49 |                 |      | Myoviridae                                                                         |                                                            |
|             | Es28PnA        | Escherichia phage TL-2011c             | AEW24625.1                | 177            | SAR Phage_lysozyme  | 100.0              | 7.4E-33 |                 |      | Podoviridae                                                                        |                                                            |
|             | Es29MnA        | Enterobacteria phage Bp7               | AEN93735.1                | 162            | Phage_lysozyme      | 100.0              | 1.3E-29 |                 |      | Myoviridae; T4-like viruses                                                        |                                                            |
|             | Es30MnM        | Enterobacteria phage RB49              | NP_891673.1               | 129            | VanY                | 99.9               | 3.8E-25 |                 |      | Myoviridae; T4-like viruses; unclassified T4-like viruses                          |                                                            |
|             | Es31SnA        | Enterobacteria phage RTP               | YP_399008.1               | 161            | SAR Phage_lysozyme  | 100.0              | 3.0E-35 |                 |      | Siphoviridae; T1-like viruses; unclassified T1-like viruses                        |                                                            |
|             | Es32SnA        | Enterobacteria phage BP-4795           | YP_001449285.1            | 177            | Phage_lysozyme      | 100.0              | 1.0E-32 |                 |      | Siphoviridae; Lambda-like viruses; unclassified Lambda-like viruses                |                                                            |
|             | Es33PnK        | Enterobacteria phage BA14              | YP_002003466.1            | 151            | Amidase_2           | 100.0              | 3.4E-30 |                 |      | Podoviridae; Autographivirinae; T7-like viruses; unclassified T7-like viruses      |                                                            |
|             | Es34PnK        | Enterobacteria phage 285P              | YP_004300550.1            | 151            | Amidase_2           | 100.0              | 2.6E-30 |                 |      | Podoviridae; Autographivirinae; T7-like viruses; unclassified T7-like viruses      |                                                            |
|             | Es35OnF        | Enterobacteria phage PRD1              | NP_040700.1               | 353            | SLT                 | 99.8               | 8.1E-22 |                 |      | Tectiviridae; tectivirus                                                           |                                                            |
|             | Es36MnA        | Enterobacteria phage P1                | YP_006484.1               | 185            | SAR Phage_lysozyme  | 100.0              | 1.6E-32 |                 |      | Myoviridae; P1-like viruses                                                        |                                                            |
|             | Es37MnA        | Enterobacteria phage JS98              | YP_001595245.1            | 162            | Phage_lysozyme      | 100.0              | 8.3E-29 |                 |      | Myoviridae; T4-like viruses; unclassified T4-like viruses; Enterobacteria phage JS |                                                            |
|             | Es38MnA        | Enterobacteria phage AR1               | BAI83135.1                | 164            | Phage_lysozyme      | 99.9               | 2.2E-27 |                 |      | Myoviridae; T4-like viruses; unclassified T4-like viruses                          |                                                            |
|             | Es39MnB        | Enterobacteria phage SfV               | NP_599082.1               | 158            | Muramidase          | 100.0              | 1.2E-51 |                 |      | Myoviridae; unclassified Myoviridae                                                |                                                            |
|             | Es40OnF        | Bacteriophage PR772                    | AAR99764.1                | 357            | SLT                 | 99.8               | 1.8E-21 |                 |      | Tectiviridae; tectivirus; Enterobacteria phage PRD1                                |                                                            |
|             | Es41OnF        | Enterobacteria phage PR5               | AAX45647.1                | 357            | SLT                 | 99.8               | 1.2E-21 |                 |      | Tectiviridae; tectivirus; Enterobacteria phage PRD1                                |                                                            |
|             | Es42OnF        | Enterobacteria phage PR4               | AAX45616.1                | 357            | SLT                 | 99.8               | 1.3E-21 |                 |      | Tectiviridae; tectivirus; Enterobacteria phage PRD1                                |                                                            |
|             | Es43PnK        | Enterobacteria phage T7                | NP_041973.1               | 151            | Amidase_2           | 100.0              | 5.8E-31 |                 |      | Podoviridae; Autographivirinae; T7-like viruses                                    |                                                            |
|             | Es44PnA        | Enterobacteria phage phiEco32          | YP_001671762.1            | 163            | Phage_lysozyme      | 100.0              | 2.9E-33 |                 |      | Podoviridae; PhiEco32-like viruses                                                 |                                                            |
|             | Es45SnA        | Enterobacteria phage A5                | ABF71471.1                | 72             | Phage_lysozyme      | 99.9               | 6.3E-25 |                 |      | Siphoviridae; T1-like viruses; unclassified T1-like viruses                        |                                                            |
|             | Es46MnB        | Enterobacteria phage 186               | AAC34155.1                | 165            | Muramidase          | 100.0              | 1.2E-49 |                 |      | Myoviridae; P2-like viruses; Enterobacteria phage P2                               |                                                            |
|             | Es47SnB        | Enterobacteria phage HK022             | AAF30387.1                | 158            | Muramidase          | 100.0              | 1.2E-49 |                 |      | Siphoviridae; Lambda-like viruses                                                  |                                                            |
|             | Es48MnA        | Enterobacteria phage JS10              | YP_002922463.1            | 162            | Phage_lysozyme      | 100.0              | 8.3E-29 |                 |      | Myoviridae; T4-like viruses; unclassified T4-like viruses                          |                                                            |
|             | Es49MnB        | Enterobacteria phage P2                | NP_046765.1               | 165            | Muramidase          | 100.0              | 1.3E-49 |                 |      | Myoviridae; Peduovirinae; P2-like viruses                                          |                                                            |
|             | Es50PnA        | Enterobacteria phage 933W (sensu lato) | NP_049505.1               | 177            | SAR Phage_lysozyme  | 100.0              | 6.5E-33 |                 |      | Podoviridae; unclassified Podoviridae; Enterobacteria phage 933W sensu lato        |                                                            |
|             | Es51SnA        | Enterobacteria phage JK06              | YP_277498.1               | 160            | Phage_lysozyme      | 100.0              | 1.1E-34 |                 |      | Siphoviridae; unclassified Siphoviridae                                            |                                                            |
|             | Es52SnA        | Enterobacteria phage N15               | NP_046950.1               | 178            | Phage_lysozyme      | 100.0              | 1.9E-32 |                 |      | Siphoviridae; N15-like viruses                                                     |                                                            |
|             | Es53PnO        | Enterobacteria phage K1E               | YP_425023.1               | 114            | Peptidase_M15_3     | 100.0              | 3.8E-39 |                 |      | Podoviridae; Autographivirinae                                                     |                                                            |
|             | Es54PnO        | Enterobacteria phage K1-5              | YP_654144.1               | 114            | Peptidase_M15_3     | 100.0              | 1.8E-39 |                 |      | Podoviridae; Autographivirinae                                                     |                                                            |
|             | Es55MnM        | Enterobacteria phage JSE               | YP_002922178.1            | 129            | VanY                | 99.9               | 2.8E-27 |                 |      | Myoviridae; T4-like viruses                                                        |                                                            |
|             | Es56MnA        | Enterobacteria phage IME08             | YP_003734260.1            | 165            | Phage_lysozyme      | 100.0              | 1.3E-28 |                 |      | Myoviridae; T4-like viruses                                                        |                                                            |
|             | Es57SnB        | Enterobacteria phage HK97              | NP_037753.1               | 158            | Muramidase          | 100.0              | 7.8E-52 |                 |      | Siphoviridae; Lambda-like viruses                                                  |                                                            |
|             | Es58MnM        | Enterobacteria phage RB43              | YP_239135.1               | 131            | VanY                | 99.6               | 1.3E-16 |                 |      | Myoviridae; T4-like viruses                                                        |                                                            |
|             | Es59MnP        | Enterobacteria phage RB16              | YP_003858447.1            | 131            |                     |                    |         | Peptidase_M15_4 | 99.7 | 1.7E-17                                                                            | Myoviridae; T4-like viruses                                |
|             | Es60MnM        | Enterobacteria phage phiP27            | NP_543082.1               | 125            | VanY                | 99.9               | 2.4E-24 |                 |      | Myoviridae                                                                         |                                                            |
|             | Es61MnM        | Enterobacteria phage phiEcoM-GJ1       | YP_001595416.1            | 131            | VanY                | 99.9               | 1.4E-25 |                 |      | Myoviridae                                                                         |                                                            |
|             | Es62MnM        | Enterobacteria phage Phi1              | YP_001469446.1            | 129            | VanY                | 99.9               | 5.6E-25 |                 |      | Myoviridae; T4-like viruses                                                        |                                                            |
|             | Es63PnK        | Enterobacteria phage EcoDS1            | YP_002003756.1            | 152            | Amidase_2           | 100.0              | 5.6E-30 |                 |      | Podoviridae; Autographivirinae; T7-like viruses                                    |                                                            |
|             | Es64SnA        | Enterobacteria phage cdtI              | YP_001272571.1            | 165            | SAR Phage_lysozyme  | 100.0              | 4.5E-35 |                 |      | Siphoviridae; Lambda-like viruses; unclassified Lambda-like viruses                |                                                            |
|             | Es65MnA        | Enterobacteria phage CC31              | YP_004009990.1            | 164            | Phage_lysozyme      | 99.9               | 3.1E-28 |                 |      | Myoviridae; T4-like viruses                                                        |                                                            |
|             | Es66PnK        | Enterobacteria phage K30               | YP_004678738.1            | 151            | Amidase_2           | 100.0              | 7.7E-31 |                 |      | Podoviridae; Autographivirinae; T7-like viruses                                    |                                                            |
|             | Es67PnB        | Enterobacteria phage CUS-3             | ABQ88407.1                | 158            | Muramidase          | 100.0              | 1.1E-51 |                 |      | Podoviridae; P22-like viruses                                                      |                                                            |
|             | Es68SnA        | Stx1 converting phage                  | BAC77971.1                | 177            | SAR Phage_lysozyme  | 100.0              | 6.5E-33 |                 |      | Siphoviridae; Lambda-like viruses; unclassified Lambda-like viruses                |                                                            |
|             | Es69PnA        | Stx2 converting phage I                | BAB88004.1                | 177            | SAR Phage_lysozyme  | 100.0              | 1.5E-32 |                 |      | Podoviridae; unclassified Podoviridae; Enterobacteria phage 933W sensu lato        |                                                            |
|             | Es70SnA        | Stx1-converting phage phi-O153         | AAW21764.1                | 177            | SAR Phage_lysozyme  | 100.0              | 1.8E-32 |                 |      | Siphoviridae; Lambda-like viruses; unclassified Lambda-like viruses                |                                                            |
|             | Es71MnA        | Escherichia phage D108                 | YP_003335769.1            | 171            | SAR Phage_lysozyme  | 100.0              | 1.1E-33 |                 |      | Myoviridae; Mu-like viruses; unclassified Mu-like viruses                          |                                                            |
|             | Es72OnF        | Enterobacteria phage PR3               | AAX45585.1                | 357            | SLT                 | 99.8               | 2.9E-21 |                 |      | Tectiviridae; Tectiviridae                                                         |                                                            |
|             | Es73SnM        | Enterobacteria phage SPC35             | YP_004306522.1            | 137            | VanY                | 99.9               | 9.7E-23 |                 |      | Siphoviridae; T5-like viruses; unclassified T5-like viruses                        |                                                            |
|             | Es74PnE1       | Enterobacteria phage N4                | YP_950539.1               | 208            | SAR Glyco_hydro_108 | 100.0              | 3.4E-36 |                 |      | Podoviridae; N4-like viruses                                                       |                                                            |
|             | Es75MnA        | Enterobacteria phage Mu                | NP_050626.1               | 171            | SAR Phage_lysozyme  | 100.0              | 7.4E-34 |                 |      | Myoviridae; Mu-like viruses                                                        |                                                            |
|             | Es76MnA        | Enterobacteria phage RB69              | NP_861818.1               | 157            | Phage_lysozyme      | 99.9               | 2.3E-28 |                 |      | Myoviridae; T4-like viruses; unclassified T4-like viruses                          |                                                            |
|             | Es77MnA        | Enterobacteria phage RB14              | YP_002854463.1            | 164            | Phage_lysozyme      | 99.9               | 1.9E-27 |                 |      | Myoviridae; T4-like viruses; unclassified T4-like viruses                          |                                                            |
|             | Es78MnA        | Enterobacteria phage RB32              | ABI94948.1                | 164            | Phage_lysozyme      | 99.9               | 2.2E-27 |                 |      | Myoviridae; T4-like viruses; unclassified T4-like viruses                          |                                                            |
|             | Es79MnA        | Enterobacteria phage RB51              | YP_002854084.1            | 164            | Phage_lysozyme      | 99.9               | 2.2E-27 |                 |      | Myoviridae; T4-like viruses; unclassified T4-like viruses                          |                                                            |
|             | Es80OnF        | Enterobacteria phage L17               | AAX45554.1                | 357            | SLT                 | 99.8               | 2.9E-21 |                 |      | Tectiviridae; tectivirus; Enterobacteria phage PRD1                                |                                                            |
|             | Erwinia        | Er1XnA                                 | Erwinia phage phiEa116    | CCA66256.1     | 134                 | Phage_lysozyme     | 100.0   | 8.8E-32         |      |                                                                                    | Viruses; unclassified phages                               |
|             |                | Er2MnA                                 | Erwinia phage vB_EamM-M7  | AEJ81266.1     | 157                 | Phage_lysozyme     | 100.0   | 2.9E-34         |      |                                                                                    | Myoviridae                                                 |
|             |                | Er3PnE1                                | Erwinia phage vB_EamP-S6  | AEJ81610.1     | 179                 | Glyco_hydro_108    | 100.0   | 9.4E-38         |      |                                                                                    | Podoviridae; N4-like viruses; unclassified N4-like viruses |
|             |                | Er4MnM                                 | Erwinia phage vB_EamM-Y2  | AEJ81402.1     | 132                 | VanY               | 99.9    | 6.7E-27         |      |                                                                                    | Myoviridae                                                 |
|             |                | Er5PnK                                 | Erwinia phage vB_EamP-L1  | AEJ81484.1     | 149                 | Amidase_2          | 100.0   | 1.9E-31         |      |                                                                                    | Podoviridae; Autographivirinae; T7-like viruses            |
|             |                | Er6MnA                                 | Erwinia phage phiEa21-4   | YP_002456060.1 | 157                 | Phage_lysozyme     | 100.0   | 1.2E-33         |      |                                                                                    | Myoviridae.                                                |
|             |                | Er7MnA                                 | Erwinia phage phiEa104    | YP_004327012.1 | 157                 | Phage_lysozyme     | 100.0   | 1.2E-33         |      |                                                                                    | Myoviridae.                                                |
|             |                | Er8PnA                                 | Erwinia phage Era103      | YP_001039680.1 | 178                 | Phage_lysozyme     | 100.0   | 7.9E-32         |      |                                                                                    | Podoviridae; Autographivirinae; SP6-like viruses           |
|             | Flavobacterium | Fl1SnC                                 | Flavobacterium phage 11b  | YP_112524.1    | 166                 | Glyco_hydro_19     | 100.0   | 7.1E-42         |      |                                                                                    | Siphoviridae.                                              |
|             | Haemophilus    | Ha1MnK                                 | Haemophilus phage SuMu    | AE642272.1     | 180                 | Amidase_2          | 99.9    | 1.2E-27         |      |                                                                                    | Myoviridae; Mu-like viruses; unclassified Mu-like viruses  |
|             |                | Ha2MnA                                 | Haemophilus phage HP1     | NP_043495.1    | 186                 | SAR Phage_lysozyme | 100.0   | 2.4E-33         |      |                                                                                    | Myoviridae; Peduovirinae; P2-like viruses.                 |
|             |                | Ha3MnA                                 | Haemophilus phage HP2     | NP_536831.1    | 179                 | SAR Phage_lysozyme | 100.0   | 3.0E-33         |      |                                                                                    | Myoviridae; Peduovirinae; P2-like viruses.                 |
|             |                | Ha4MnC                                 | Haemophilus phage Aaphi23 | NP_852750.1    | 193                 | Glyco_hydro_19     | 100.0   | 3.5E-40         |      |                                                                                    | Myoviridae.                                                |
|             | Halomonas      | HI1MnE1                                | Halomonas phage phiHAP-1  | YP_001686781.1 | 211                 | Glyco_hydro_108    | 100.0   | 1.6E-36         |      |                                                                                    | Myoviridae.                                                |
|             | Iodobacteria   | Iol1MnA                                | Iodobacteriophage phiPLPE | YP_002128449.1 | 167                 | SAR Phage_lysozyme | 100.0   | 1.6E-33         |      |                                                                                    | Myoviridae                                                 |



|                                                  |                                   |                                       |                |                    |                    |          |         |              |              |                 |                |                                                     |                                                                                      |                                                 |
|--------------------------------------------------|-----------------------------------|---------------------------------------|----------------|--------------------|--------------------|----------|---------|--------------|--------------|-----------------|----------------|-----------------------------------------------------|--------------------------------------------------------------------------------------|-------------------------------------------------|
| Klebsiella                                       | KI1PnK                            | Klebsiella phage K11                  | YP_002003804.1 | 151                | Amidase_2          | 100.0    | 4.0E-30 |              |              |                 |                |                                                     | Podoviridae; Autographivirinae; T7-like viruses.                                     |                                                 |
|                                                  | KI2PnK                            | Klebsiella phage KP32                 | YP_003347533.1 | 151                | Amidase_2          | 100.0    | 1.2E-30 |              |              |                 |                |                                                     | Podoviridae; Autographivirinae; T7-like viruses; unclassified T7-like viruses        |                                                 |
|                                                  | KI3MnP                            | Klebsiella phage KP15                 | YP_003580002.1 | 131                |                    |          |         |              |              | Peptidase_M15_4 | 99.7           | 2.7E-17                                             | Myoviridae; T4-like viruses.                                                         |                                                 |
|                                                  | KI4MnA                            | Enterobacteria phage vB_KleM-RaK2     | AFA44346.1     | 162                | Phage_lysozyme     | 99.9     | 1.9E-28 |              |              |                 |                |                                                     | Myoviridae.                                                                          |                                                 |
| Kluyvera                                         | Ku1PnK                            | Kluyvera phage Kvp1                   | YP_002308397.1 | 151                | Amidase_2          | 100.0    | 8.9E-31 |              |              |                 |                |                                                     | Podoviridae; Autographivirinae; T7-like viruses.                                     |                                                 |
| Mannheimia                                       | Ma1MnA                            | Mannheimia phage phiMHaA1             | YP_655477.1    | 188                | Phage_lysozyme     | 100.0    | 1.2E-32 |              |              |                 |                |                                                     | Myoviridae; Peduovirinae; P2-like viruses.                                           |                                                 |
|                                                  | Ma2MnA                            | Mannheimia phage phiMhaA1-PHL101      | ABD90561.1     | 188                | Phage_lysozyme     | 100.0    | 1.2E-32 |              |              |                 |                |                                                     | Myoviridae; P2-like viruses; unclassified P2-like viruses; Mannheimia phage phiMHaA1 |                                                 |
| Morganella                                       | Mo1PnK                            | Morganella phage MmP1                 | YP_002048642.1 | 153                | Amidase_2          | 100.0    | 1.0E-30 |              |              |                 |                |                                                     | Podoviridae; Autographivirinae; T7-like viruses.                                     |                                                 |
| Pantoea                                          | Pa1PnA                            | Pantoea phage LIMELight               | CBW54813.1     | 215                | Phage_lysozyme     | 100.0    | 7.5E-32 |              |              |                 |                |                                                     | Podoviridae; Autographivirinae; unclassified phiKMV-like phages                      |                                                 |
|                                                  | Pa2PnE1                           | Pantoea phage LIMeZero                | YP_004539128.1 | 175                | Glyco_hydro_108    | 100.0    | 3.8E-37 |              |              | PG_binding_3    | 99.9           | 3.2E-24                                             | Podoviridae; Autographivirinae; unclassified phiKMV-like phages.                     |                                                 |
| unclassified Alphaproteobacteria (miscellaneous) | Un1SnP                            | Phage phiJL001                        | YP_224014.1    | 106                | Peptidase_M15_4    | 99.9     | 1.0E-21 |              |              |                 |                |                                                     | Siphoviridae.                                                                        |                                                 |
| Planktothrix                                     | Pl1XnQ                            | Planktothrix phage PaV-LD             | YP_004957396.1 | 197                |                    |          |         |              |              | Peptidase_M23   | 100.0          | 4.9E-30                                             | Viruses; unclassified phages                                                         |                                                 |
| Pseudoalteromonas                                | Pe1SnO                            | Pseudoalteromonas phage H105/1        | YP_004327143.1 | 113                | Peptidase_M15_3    | 100.0    | 1.0E-38 |              |              |                 |                |                                                     | Siphoviridae.                                                                        |                                                 |
| Pseudomonas                                      | Ps1PnA                            | Pseudomonas phage LKA1                | YP_001522894.1 | 183                | SAR Phage_lysozyme | 100.0    | 2.3E-31 |              |              |                 |                |                                                     | Podoviridae; Autographivirinae                                                       |                                                 |
|                                                  | Ps2SnF                            | Pseudomonas phage B3                  | YP_164061.1    | 264                | SLT                | 99.9     | 2.9E-23 |              |              |                 |                |                                                     | Siphoviridae                                                                         |                                                 |
|                                                  | Ps3SnB                            | Pseudomonas phage D3                  | NP_061527.1    | 160                | Muramidase         | 100.0    | 7.5E-52 |              |              |                 |                |                                                     | Siphoviridae                                                                         |                                                 |
|                                                  | Ps4SnC                            | Pseudomonas phage F10                 | YP_001293405.1 | 205                | Glyco_hydro_19     | 100.0    | 6.8E-42 |              |              |                 |                |                                                     | Siphoviridae                                                                         |                                                 |
|                                                  | Ps5PnA                            | Pseudomonas phage F116                | YP_164326.1    | 177                | Phage_lysozyme     | 100.0    | 1.9E-32 |              |              |                 |                |                                                     | Podoviridae                                                                          |                                                 |
|                                                  | Ps6MnC                            | Pseudomonas phage F8                  | YP_001294463.1 | 220                | Glyco_hydro_19     | 100.0    | 1.4E-44 |              |              |                 |                |                                                     | Myoviridae                                                                           |                                                 |
|                                                  | Ps7PnK                            | Pseudomonas phage gh-1                | NP_813758.1    | 146                | Amidase_2          | 100.0    | 2.3E-31 |              |              |                 |                |                                                     | Podoviridae; Autographivirinae; T7-like viruses                                      |                                                 |
|                                                  | Ps8MnC                            | Pseudomonas phage LBL3                | YP_002154189.1 | 220                | Glyco_hydro_19     | 100.0    | 2.9E-48 |              |              |                 |                |                                                     | Myoviridae                                                                           |                                                 |
|                                                  | Ps9PnA                            | Pseudomonas phage LKD16               | YP_001522837.1 | 160                | Phage_lysozyme     | 100.0    | 6.7E-33 |              |              |                 |                |                                                     | Podoviridae; Autographivirinae                                                       |                                                 |
|                                                  | Ps10MnC                           | Pseudomonas phage LMA2                | YP_002154280.1 | 220                | Glyco_hydro_19     | 100.0    | 9.1E-47 |              |              |                 |                |                                                     | Myoviridae                                                                           |                                                 |
|                                                  | Ps11PnA                           | Pseudomonas phage LUZ19               | YP_001671990.1 | 160                | SAR Phage_lysozyme | 100.0    | 4.6E-33 |              |              |                 |                |                                                     | Podoviridae; Autographivirinae; unclassified phiKMV-like phages                      |                                                 |
|                                                  | Ps12XnA                           | Pseudomonas phage PA11                | YP_001294626.1 | 145                | Phage_lysozyme     | 100.0    | 5.9E-36 |              |              |                 |                |                                                     | unclassified dsDNA phages                                                            |                                                 |
|                                                  | Ps13SnA                           | Pseudomonas phage PAJU2               | YP_002284361.1 | 144                | Phage_lysozyme     | 100.0    | 1.6E-35 |              |              |                 |                |                                                     | Siphoviridae                                                                         |                                                 |
|                                                  | Ps14PnA                           | Pseudomonas phage PaP3                | NP_775256.1    | 165                | Phage_lysozyme     | 100.0    | 7.4E-31 |              |              |                 |                |                                                     | Podoviridae                                                                          |                                                 |
|                                                  | Ps15MnC                           | Pseudomonas phage PB1                 | YP_002455978.1 | 220                | Glyco_hydro_19     | 100.0    | 4.0E-46 |              |              |                 |                |                                                     | Myoviridae                                                                           |                                                 |
|                                                  | Ps16OnF                           | Pseudomonas phage phi13 (S-segment)   | NP_690810.1    | 245                |                    |          |         |              |              | SLT             | 99.9           | 2.3E-24                                             | Cystoviridae; cystovirus                                                             |                                                 |
|                                                  | Ps17PnK                           | Pseudomonas phage phi15               | YP_004286199.1 | 153                | Amidase_2          | 100.0    | 3.1E-30 |              |              |                 |                |                                                     | Podoviridae; Autographivirinae; T7-like viruses                                      |                                                 |
|                                                  | Ps18PnA                           | Pseudomonas phage phi-2               | YP_003345505.1 | 166                | Phage_lysozyme     | 100.0    | 1.2E-32 |              |              |                 |                |                                                     | Podoviridae; Autographivirinae; unclassified phiKMV-like phages                      |                                                 |
|                                                  | Ps19OnH                           | Pseudomonas phage phi2954 (S-segment) | YP_002600773.1 | 231                | Glucosaminidase    | 100.0    | 4.6E-35 |              |              |                 |                |                                                     | Cystoviridae                                                                         |                                                 |
|                                                  | Ps20PnK                           | Pseudomonas phage phiBB-PF7A          | YP_004306332.1 | 153                | Amidase_2          | 100.0    | 2.7E-31 |              |              |                 |                |                                                     | Podoviridae; Autographivirinae; T7-like viruses                                      |                                                 |
|                                                  | Ps21PnA                           | Pseudomonas phage phiK77              | YP_002727868.1 | 160                | SAR Phage_lysozyme | 99.9     | 1.1E-28 |              |              |                 |                |                                                     | Podoviridae; Autographivirinae; unclassified phiKMV-like phages.                     |                                                 |
|                                                  | Ps22MnF5                          | Pseudomonas phage phiKZ               | NP_803710.1    | 260                | PG_binding_1       | 99.5     | 2.2E-14 |              |              | SLT             | 98.3           | 3.1E-07                                             | Myoviridae; phiKZ-like viruses.                                                      |                                                 |
|                                                  | Ps23PnA                           | Pseudomonas phage PT2                 | YP_002117830.1 | 160                | SAR Phage_lysozyme | 99.9     | 1.1E-28 |              |              |                 |                |                                                     | Podoviridae; Autographivirinae                                                       |                                                 |
|                                                  | Ps24PnA                           | Pseudomonas phage PT5                 | YP_002117771.1 | 160                | SAR Phage_lysozyme | 99.9     | 1.1E-28 |              |              |                 |                |                                                     | Podoviridae; Autographivirinae                                                       |                                                 |
|                                                  | Ps25MnC                           | Pseudomonas phage SN                  | YP_002418854.1 | 220                | Glyco_hydro_19     | 100.0    | 4.1E-45 |              |              |                 |                |                                                     | Myoviridae                                                                           |                                                 |
|                                                  | Ps26SnB                           | Pseudomonas phage phi297              | YP_005098091.1 | 160                | Muramidase         | 100.0    | 4.1E-52 |              |              |                 |                |                                                     | Siphoviridae                                                                         |                                                 |
|                                                  | Ps27PnA                           | Pseudomonas phage Bf7                 | YP_005098158.1 | 168                | Phage_lysozyme     | 100.0    | 4.4E-34 |              |              |                 |                |                                                     | Podoviridae.                                                                         |                                                 |
|                                                  | Ps28MnF55                         | Pseudomonas phage EL                  | YP_418221.1    | 292                | PG_binding_1       | 99.6     | 3.1E-15 | PG_binding_1 | 96.9         | 6.7E-04         | SLT            | 99.7                                                | 3.0E-17                                                                              | Myoviridae; phiKZ-like viruses                  |
|                                                  | Ps29MnC55                         | Pseudomonas phage OBP                 | YP_004958186.1 | 328                | PG_binding_1       | 98.9     | 7.6E-10 | PG_binding_1 | 99.4         | 1.1E-13         | Glyco_hydro_19 | 100.0                                               | 7.8E-41                                                                              | Myoviridae                                      |
|                                                  | Ps30MnF                           | Pseudomonas phage PaP1                | AEK21612.1     | 186                | SLT                | 99.0     | 1.0E-10 |              |              |                 |                |                                                     | Myoviridae                                                                           |                                                 |
|                                                  | Ps31MnF5                          | Pseudomonas phage 201phi21            | YP_001956952.1 | 262                | PG_binding_1       | 99.5     | 1.0E-14 |              |              | SLT             | 96.8           | 1.1E-03                                             | Myoviridae; phiKZ-like viruses                                                       |                                                 |
|                                                  | Ps32PnA                           | PseudomonasLUZ24                      | YP_001671940.1 | 132                | Phage_lysozyme     | 100.0    | 4.5E-32 |              |              |                 |                |                                                     | Podoviridae                                                                          |                                                 |
| Ps33OnN                                          | Pseudomonas phage phi-6 segment S | NP_620343.1                           | 220            | Peptidase_U40      | 100.0              | 2.0E-138 |         |              |              |                 |                | Cystoviridae; Cystovirus.                           |                                                                                      |                                                 |
| Ps34OnE1                                         | Pseudomonas phage phi8 segment S  | NP_524568.1                           | 169            | Glyco_hydro_108    | 100.0              | 4.7E-37  |         |              | PG_binding_3 | 99.8            | 1.3E-21        | Cystoviridae; Cystovirus.                           |                                                                                      |                                                 |
| Ps35SnB                                          | Pseudomonas phage vB_PaeS_PMG1    | YP_005098234.1                        | 160            | Muramidase         | 100.0              | 1.1E-49  |         |              |              |                 |                | Siphoviridae.                                       |                                                                                      |                                                 |
| Ps36PnA                                          | Enterobacteria phage phiKMV       | NP_877484.1                           | 160            | SAR Phage_lysozyme | 100.0              | 4.2E-33  |         |              |              |                 |                | Podoviridae; Autographivirinae; phiKMV-like viruses |                                                                                      |                                                 |
| Pasteurella                                      | Pt1MnA                            | Pasteurella phage F108                | 654740.1       | 183                | Phage_lysozyme     | 100.0    | 3.4E-33 |              |              |                 |                |                                                     | Myoviridae; Peduovirinae; P2-like viruses                                            |                                                 |
| Prochlorococcus                                  | Pr1SnHT                           | Cyanophage PSS2                       | YP_003084242.1 | 408                | Glucosaminidase    | 100.0    | 7.2E-31 |              |              | Peptidase_C39_2 | 99.7           | 5.9E-17                                             | Siphoviridae.                                                                        |                                                 |
| Ralstonia                                        | Ra1XnK                            | Ralstonia phage RSB2                  | BAJ51815.1     | 156                | Amidase_2          | 100.0    | 1.6E-29 |              |              |                 |                |                                                     | Viruses; unclassified phages                                                         |                                                 |
| Salmonella                                       | Sa1SnA                            | Salmonella phage SETP3                | YP_001110823.1 | 162                | Phage_lysozyme     | 100.0    | 7.5E-35 |              |              |                 |                |                                                     | Siphoviridae                                                                         |                                                 |
|                                                  | Sa2PnM                            | Bacteriophage PS3                     | CAA09701.1     | 132                | VanY               | 99.7     | 6.3E-18 |              |              |                 |                |                                                     | Podoviridae; unclassified Podoviridae                                                |                                                 |
|                                                  | Sa3PnA                            | Enterobacteria phage ST104            | YP_006397.1    | 156                | SAR Phage_lysozyme | 100.0    | 5.8E-35 |              |              |                 |                |                                                     | Podoviridae; P22-like viruses.                                                       |                                                 |
|                                                  | Sa4PnO                            | Enterobacteria phage SP6              | AAR90036.1     | 116                | Peptidase_M15_3    | 100.0    | 2.4E-39 |              |              |                 |                |                                                     | Podoviridae; Autographivirinae                                                       |                                                 |
|                                                  | Sa5MnA                            | Enterobacteria phage Felix 01         | NP_944846.1    | 154                | Phage_lysozyme     | 100.0    | 7.2E-34 |              |              |                 |                |                                                     | Myoviridae                                                                           |                                                 |
|                                                  | Sa6PnA                            | Enterobacteria phage P22              | DAA01040.1     | 146                | Phage_lysozyme     | 100.0    | 1.3E-34 |              |              |                 |                |                                                     | Podoviridae; P22-like viruses                                                        |                                                 |
|                                                  | Sa7MnB                            | Bacteriophage WPhi                    | AAN28227.1     | 165                | Muramidase         | 100.0    | 1.2E-49 |              |              |                 |                |                                                     | Myoviridae; P2-like viruses; Enterobacteria phage P2                                 |                                                 |
|                                                  | Sa8SnP                            | Enterobacteria phage EPS7             | YP_001836966.1 | 80                 | Peptidase_M15_4    | 99.8     | 1.1E-21 |              |              |                 |                |                                                     | Siphoviridae; unclassified Siphoviridae                                              |                                                 |
|                                                  | Sa9MnA                            | Enterobacteria phage Fels-2           | YP_001718740.1 | 158                | Phage_lysozyme     | 100.0    | 8.4E-34 |              |              |                 |                |                                                     | Myoviridae; P2-like viruses; unclassified P2-like viruses                            |                                                 |
|                                                  | Sa10SnA                           | Salmonella phage ES18                 | YP_224214.1    | 145                | Phage_lysozyme     | 100.0    | 2.3E-34 |              |              |                 |                |                                                     | Siphoviridae; unclassified Siphoviridae                                              |                                                 |
|                                                  | Sa11MnB                           | Salmonella phage PsP3                 | NP_958065.1    | 165                | Muramidase         | 100.0    | 2.9E-49 |              |              |                 |                |                                                     | Myoviridae; P2-like viruses; unclassified P2-like viruses                            |                                                 |
|                                                  | Sa12SnB                           | Salmonella phage E1                   | YP_001742044.1 | 154                | Muramidase         | 100.0    | 1.5E-52 |              |              |                 |                |                                                     | Siphoviridae                                                                         |                                                 |
|                                                  | Sa13SnA                           | Salmonella phage SETP12               | ABN70688.1     | 162                | Phage_lysozyme     | 100.0    | 7.5E-35 |              |              |                 |                |                                                     | Siphoviridae                                                                         |                                                 |
|                                                  | Sa14SnA                           | Salmonella phage SETP5                | ABN70687.1     | 162                | Phage_lysozyme     | 100.0    | 7.5E-35 |              |              |                 |                |                                                     | Siphoviridae                                                                         |                                                 |
|                                                  | Sa15PnB                           | Salmonella phage HK620                | NP_112069.1    | 158                | Muramidase         | 100.0    | 7.8E-52 |              |              |                 |                |                                                     | Podoviridae; P22-like viruses                                                        |                                                 |
|                                                  | Sa16XnA                           | Salmonella phage RE-2010              | ADQ92398.1     | 171                | Phage_lysozyme     | 100.0    | 7.7E-34 |              |              |                 |                |                                                     | Viruses; unclassified phages                                                         |                                                 |
|                                                  | Sa17XnA                           | Phage Gifsy-1                         | YP_001700616.1 | 149                | Phage_lysozyme     | 100.0    | 2.9E-35 |              |              |                 |                |                                                     | Viruses; unclassified phages.                                                        |                                                 |
|                                                  | Sa18XnA                           | Phage Gifsy-2                         | YP_001700672.1 | 150                | Phage_lysozyme     | 100.0    | 1.8E-34 |              |              |                 |                |                                                     | Viruses; unclassified phages.                                                        |                                                 |
|                                                  | Sa19PnB                           | Salmonella phage c341                 | YP_003090277.1 | 158                | Muramidase         | 100.0    | 1.1E-51 |              |              |                 |                |                                                     | Podoviridae; P22-like viruses                                                        |                                                 |
|                                                  | Sa20PnC                           | Salmonella phage epsilon15            | NP_848233.1    | 209                | Glyco_hydro_19     | 100.0    | 1.1E-42 |              |              |                 |                |                                                     | Podoviridae                                                                          |                                                 |
|                                                  | Sa21PnB                           | Salmonella phage epsilon34            | YP_002533525.1 | 158                | Muramidase         | 100.0    | 1.1E-51 |              |              |                 |                |                                                     | Podoviridae; P22-like viruses                                                        |                                                 |
|                                                  | Sa22XnC                           | Salmonella phage Fels-1               | YP_001700560.1 | 204                | Glyco_hydro_19     | 100.0    | 1.2E-41 |              |              |                 |                |                                                     | Viruses; unclassified phages                                                         |                                                 |
|                                                  | Sa23pnK                           | Salmonella phage phiSG-JL2            | YP_001949762.1 | 151                | Amidase_2          | 100.0    | 4.8E-31 |              |              |                 |                |                                                     |                                                                                      | Podoviridae; Autographivirinae; T7-like viruses |

|               |                          |                                      |                |                 |                    |         |         |  |               |                 |         |                                                                               |                                                                |
|---------------|--------------------------|--------------------------------------|----------------|-----------------|--------------------|---------|---------|--|---------------|-----------------|---------|-------------------------------------------------------------------------------|----------------------------------------------------------------|
| Salmonella    | Sa24MnC5                 | Salmonella phage PVP-SE1             | YP_004893953.1 | 236             | PG_binding_1       | 97.0    | 4.4E-04 |  |               |                 |         |                                                                               | Myoviridae                                                     |
|               | Sa25PnA                  | Salmonella phage SE1                 | YP_002455881.1 | 167             | SAR Phage_lysozyme | 100.0   | 5.4E-35 |  |               |                 |         |                                                                               | Podoviridae; P22-like viruses                                  |
|               | Sa26XnC                  | Salmonella phage ST64B               | NP_700425.1    | 204             | Glyco_hydro_19     | 100.0   | 1.5E-41 |  |               |                 |         |                                                                               | unclassified dsDNA phages                                      |
|               | Sa27PnP                  | Salmonella phage ST64T               | NP_720320.1    | 132             | -                  |         |         |  |               |                 |         |                                                                               | Podoviridae; P22-like viruses                                  |
|               | Sa28PnK                  | Salmonella phage Vi06                | YP_004306666.1 | 151             | Amidase_2          | 100.0   | 6.0E-31 |  |               |                 |         |                                                                               | Podoviridae; Autographivirinae; T7-like viruses                |
|               | Sa29PnC                  | Salmonella phage SPN1S               | YP_005098003.1 | 209             | Glyco_hydro_19     | 100.0   | 1.2E-41 |  |               |                 |         |                                                                               | Podoviridae.                                                   |
|               | Sa30SnA                  | Salmonella phage SE2                 | YP_005098118.1 | 162             | Phage_lysozyme     | 100.0   | 8.0E-35 |  |               |                 |         |                                                                               | Siphoviridae                                                   |
|               | Sa31SnA                  | Salmonella phage SS3e                | YP_005097816.1 | 162             | Phage_lysozyme     | 100.0   | 1.5E-34 |  |               |                 |         |                                                                               | Siphoviridae                                                   |
|               | Sa32PnA                  | Salmonella Phage PS34                | O80288.1       | 167             | SAR Phage_lysozyme | 100.0   | 3.7E-35 |  |               |                 |         |                                                                               | Podoviridae.                                                   |
| Sa33PnK       | Enterobacteria phage 13a | YP_002003950.1                       | 151            | Amidase_2       | 100.0              | 1.0E-30 |         |  |               |                 |         | Podoviridae; Autographivirinae; T7-like viruses; unclassified T7-like viruses |                                                                |
| Shigella      | Sh1PnB                   | Shigella phage Sf6                   | NP_958236.1    | 158             | Muramidase         | 100.0   | 1.2E-51 |  |               |                 |         |                                                                               | Podoviridae; P22-like viruses                                  |
|               | Sh2SnA                   | Shigella phage Shf1                  | YP_004414884.1 | 162             | Phage_lysozyme     | 100.0   | 1.5E-34 |  |               |                 |         |                                                                               | Siphoviridae; T1-like viruses; unclassified T1-like viruses    |
|               | Sh3MnA                   | Shigella phage Shf2                  | YP_004415022.1 | 164             | Phage_lysozyme     | 99.9    | 4.3E-27 |  |               |                 |         |                                                                               | Myoviridae; T4-like viruses                                    |
|               | Sh4SnA                   | Shigella phage EP23                  | YP_004957490.1 | 163             | Phage_lysozyme     | 100.0   | 2.7E-33 |  |               |                 |         |                                                                               | Siphoviridae                                                   |
| Sinorhizobium | Si1XnK                   | Sinorhizobium phage PBC5             | NP_542265.1    | 187             | Amidase_2          | 99.9    | 3.8E-27 |  |               |                 |         |                                                                               | unclassified dsDNA phages                                      |
| Sodalis       | So1XnA                   | Sodalis phage phiSG1                 | YP_516184.1    | 143             | Phage_lysozyme     | 100.0   | 4.4E-35 |  |               |                 |         |                                                                               | Viruses; unclassified phages                                   |
|               | So2SnA                   | Sodalis phage SO-1                   | YP_003344991.1 | 163             | Phage_lysozyme     | 100.0   | 9.6E-34 |  |               |                 |         |                                                                               | Siphoviridae                                                   |
| Synechococcus | Sy1MnAO                  | Synechococcus phage S-CAM8           | AET72712.1     | 212             | Phage_lysozyme     | 99.4    | 4.1E-15 |  |               | Peptidase_M15_3 | 100.0   | 4.4E-34                                                                       | Viruses; dsDNA viruses, no RNA stage; Caudovirales; Myoviridae |
|               | Sy2SnHT                  | Synechococcus phage S-CBS1           | YP_004934624.1 | 373             | Glucosaminidase    | 100.0   | 4.9E-29 |  |               | Peptidase_C39_2 | 99.7    | 2.8E-15                                                                       | Siphoviridae                                                   |
|               | Sy3SnQ                   | Synechococcus phage S-CBS2           | YP_004421540.1 | 101             | Peptidase_M23      | 99.9    | 6.7E-27 |  |               |                 |         |                                                                               | Siphoviridae                                                   |
|               | Sy4SnAT                  | Synechococcus phage S-CBS2 (another) | YP_004421508.1 | 382             | Phage_lysozyme     | 100.0   | 1.2E-29 |  |               | Peptidase_C39_2 | 99.7    | 4.8E-16                                                                       | Siphoviridae                                                   |
|               | Sy5SnAO                  | Synechococcus phage S-CBS3           | YP_004421745.1 | 359             | Phage_lysozyme     | 99.9    | 2.8E-29 |  |               | Peptidase_M15_3 | 100.0   | 8.5E-31                                                                       | Siphoviridae                                                   |
|               | Sy6XnHR                  | Synechococcus phage S-CBS4           | YP_005098362.1 | 314             | Glucosaminidase    | 100.0   | 5.2E-31 |  |               | YkuD            | 99.7    | 7.1E-18                                                                       | unclassified dsDNA phages                                      |
|               | Sy7MnA                   | Synechococcus phage S-CRM01          | YP_004508546.1 | 185             | Phage_lysozyme     | 99.9    | 8.4E-25 |  |               |                 |         |                                                                               | Myoviridae                                                     |
|               | Sy8MnA                   | Synechococcus phage S-PM2            | YP_195189.2    | 72              | Phage_lysozyme     | 99.9    | 3.7E-24 |  |               |                 |         |                                                                               | Myoviridae; T4-like viruses                                    |
|               | Sy9MnT                   | Synechococcus phage S-PM2 (another)  | YP_195188.1    | 231             |                    |         |         |  |               | Peptidase_C39_2 | 99.8    | 9.9E-20                                                                       | Myoviridae; T4-like viruses                                    |
| Thalassomonas | Ta1PnK                   | Thalassomonas phage BA3              | YP_001552293.1 | 129             | Amidase_2          | 100.0   | 6.9E-31 |  |               |                 |         |                                                                               | Podoviridae                                                    |
| Thermus       | Th1SnQ                   | Thermus phage P23-45                 | YP_001467961.1 | 165             | Peptidase_M23      | 100.0   | 2.0E-28 |  |               |                 |         |                                                                               | Siphoviridae                                                   |
|               | Th2XnM                   | Thermus phage P23-77                 | YP_003169716.1 | 203             | VanY               | 99.9    | 4.5E-26 |  |               |                 |         |                                                                               | unclassified dsDNA phages                                      |
|               | Th3XnJ                   | Thermus phage P23-77 (another)       | YP_003169717.1 | 178             | Amidase_3          | 100.0   | 8.3E-47 |  |               |                 |         |                                                                               | unclassified dsDNA phages                                      |
|               | Th4SnQ                   | Thermus phage P74-26                 | YP_001468077.1 | 153             | Peptidase_M23      | 100.0   | 8.6E-29 |  |               |                 |         |                                                                               | Siphoviridae                                                   |
|               | Th5MnQ                   | Thermus phage phiYS40                | YP_874157.1    | 345             | -                  |         |         |  | Peptidase_M23 | 99.9            | 9.3E-25 |                                                                               | Myoviridae                                                     |
|               | Th6MnQ                   | Thermus phage TMA                    | YP_004782349.1 | 346             | -                  |         |         |  | Peptidase_M23 | 99.9            | 1.6E-24 |                                                                               | Myoviridae                                                     |
| Vibrio        | Vi1PnK                   | Vibrio phage ICP3                    | YP_004251275.1 | 144             | Amidase_2          | 100.0   | 1.3E-30 |  |               |                 |         |                                                                               | Podoviridae; Autographivirinae; T7-like viruses                |
|               | Vi2MnA                   | Vibrio phage K139                    | NP_536660.1    | 195             | Phage_lysozyme     | 100.0   | 1.8E-32 |  |               |                 |         |                                                                               | Myoviridae; Peduovirinae; P2-like viruses; K139-like phages    |
|               | Vi3MnA                   | Vibrio phage kappa                   | YP_001650899.1 | 195             | Phage_lysozyme     | 100.0   | 1.8E-32 |  |               |                 |         |                                                                               | Myoviridae; Peduovirinae; P2-like viruses; K139-like phages    |
|               | Vi4PnK                   | Vibrio phage N4                      | YP_003347926.1 | 144             | Amidase_2          | 100.0   | 1.3E-30 |  |               |                 |         |                                                                               | Podoviridae; Autographivirinae; T7-like viruses                |
|               | Vi5PnO                   | Vibrio phage VP93                    | YP_002875665.1 | 137             | Peptidase_M15_3    | 100.0   | 1.8E-36 |  |               |                 |         |                                                                               | Podoviridae; Autographivirinae                                 |
|               | Vi6PnK                   | Vibrio phage ICP3_2009_B             | ADX87518.1     | 144             | Amidase_2          | 100.0   | 5.9E-31 |  |               |                 |         |                                                                               | Podoviridae; Autographivirinae; T7-like viruses                |
|               | Vi7PnK                   | Vibriophage VP4                      | YP_249586.1    | 144             | Amidase_2          | 100.0   | 8.4E-31 |  |               |                 |         |                                                                               | Podoviridae; Autographivirinae; T7-like viruses                |
|               | Vi8PnK                   | Vibrio phage ICP3_2007_A             | ADX87661.1     | 144             | Amidase_2          | 100.0   | 9.2E-31 |  |               |                 |         |                                                                               | Podoviridae; Autographivirinae; T7-like viruses                |
|               | Vi9MnE1                  | Vibrio phage VP882                   | YP_001039881.1 | 184             | Glyco_hydro_108    | 100.0   | 1.5E-37 |  |               | PG_binding_3    | 99.9    | 7.9E-25                                                                       | Myoviridae                                                     |
| Vi10MnE1      | Vibrio phage VP58.5      | CAX65037.1                           | 185            | Glyco_hydro_108 | 100.0              | 1.2E-37 |         |  | PG_binding_3  | 99.9            | 1.8E-24 | Myoviridae; VHML-like phages                                                  |                                                                |
| Xanthomonas   | Xa1SnA                   | Xanthomonas phage OP1                | YP_453585.1    | 166             | SAR Phage_lysozyme | 100.0   | 3.0E-34 |  |               |                 |         |                                                                               | Siphoviridae                                                   |
|               | Xa2SnA                   | Xanthomonas phage phiL7              | YP_002922642.1 | 174             | SAR Phage_lysozyme | 100.0   | 4.2E-34 |  |               |                 |         |                                                                               | Siphoviridae                                                   |
|               | Xa3SnA                   | Xanthomonas phage Xop411             | YP_001285697.1 | 178             | SAR Phage_lysozyme | 100.0   | 8.2E-34 |  |               |                 |         |                                                                               | Siphoviridae                                                   |
|               | Xa4SnA                   | Xanthomonas phage Xp10               | NP_858975.1    | 223             | Phage_lysozyme     | 100.0   | 1.1E-32 |  |               |                 |         |                                                                               | Siphoviridae                                                   |
|               | Xa5XnP                   | Xanthomonas phage Xp15               | YP_239293.1    | 155             | -                  |         |         |  |               | Peptidase_M15_4 | 99.7    | 4.9E-18                                                                       | unclassified dsDNA phages                                      |
| Xylella       | Xy1PnA                   | Xylella phage Xfas53                 | YP_003344916.1 | 163             | Phage_lysozyme     | 100.0   | 2.7E-35 |  |               |                 |         |                                                                               | Podoviridae                                                    |
| Yersinia      | Ye1PnK                   | Yersinia pestis phage phiA1122       | NP_848277.1    | 151             | Amidase_2          | 100.0   | 5.9E-31 |  |               |                 |         |                                                                               | Podoviridae; Autographivirinae; T7-like viruses                |
|               | Ye2PnK                   | Yersinia phage Berlin                | YP_918995.1    | 151             | Amidase_2          | 100.0   | 2.5E-31 |  |               |                 |         |                                                                               | Podoviridae; Autographivirinae; T7-like viruses                |
|               | Ye3MnB                   | Yersinia phage L-413C                | NP_839858.1    | 165             | Muramidase         | 100.0   | 3.4E-53 |  |               |                 |         |                                                                               | Myoviridae; Peduovirinae; P2-like viruses                      |
|               | Ye4MnO                   | Yersinia phage phiR1-37              | YP_004934318.1 | 119             | Peptidase_M15_3    | 100.0   | 3.7E-39 |  |               |                 |         |                                                                               | Myoviridae                                                     |
|               | Ye5PnK                   | Yersinia phage phiYeO3-12            | NP_052084.1    | 151             | Amidase_2          | 100.0   | 6.1E-31 |  |               |                 |         |                                                                               | Podoviridae; Autographivirinae; T7-like viruses                |
|               | Ye6SnA                   | Yersinia phage PY54                  | NP_892107.1    | 177             | Phage_lysozyme     | 100.0   | 3.9E-33 |  |               |                 |         |                                                                               | Siphoviridae                                                   |
|               | Ye7PnK                   | Yersinia phage Yepe2                 | YP_002003326.1 | 151             | Amidase_2          | 100.0   | 2.5E-31 |  |               |                 |         |                                                                               | Podoviridae; Autographivirinae; T7-like viruses                |
|               | Ye8MnM                   | Yersinia phage PY100                 | CAJ28446.1     | 138             | VanY               | 99.9    | 1.2E-24 |  |               |                 |         |                                                                               | Myoviridae                                                     |
|               | Ye9PnK                   | Yersinia phage Yep-phi               | ADQ83168.1     | 151             | Amidase_2          | 100.0   | 1.1E-30 |  |               |                 |         |                                                                               | Podoviridae; Autographivirinae; T7-like viruses                |
